# Supplementary material for: Effects of microgravity exposure and fructo-oligosaccharide ingestion on the proteome of soleus and extensor digitorum longus muscles in developing mice
Source: PubMed Central journal article supplement (PMC8448765; doi:10.1038/s41526-021-00164-6), 2021-09-17
Supplement: 41526_2021_164_MOESM1_ESM.pdf [file 41526_2021_164_MOESM1_ESM.pdf]

# 1 Supplementary Tables

## 2 Supplementary Table 1: Results of gene ontology analysis for the proteins

3 extracted in supernatant-1 (SUP-1) and supernatant-2 (SUP-2) from soleus (Sol)

4 and extensor digitorum longus (EDL) muscles of mice. As a result of LC-MS/MS

5 analysis, 1,019 and 655 proteins were identified in SUP-1 and SUP-2, respectively, and

6 402 proteins were identified in both supernatants. Gene ontology analysis was

7 performed using DAVID Bioinformatics Resources 6.8. The top 10 cellular components

8 of the identified proteins in SUP-1 (a) and SUP-2 (b) are depicted.

9

10 a: The proteins in SUP-1

| Term                         | No. of proteins |
|------------------------------|-----------------|
| Cytoplasm                    | 572             |
| Extracellular exosome        | 528             |
| Mitochondrion                | 361             |
| Nucleus                      | 360             |
| Cytosol                      | 263             |
| Extracellular space          | 149             |
| Nucleoplasm                  | 136             |
| Mitochondrial inner membrane | 131             |
| Extracellular region         | 112             |
| Myelin sheath                | 105             |

11

12 b: The proteins in SUP-2

| Term                         | No. of proteins |
|------------------------------|-----------------|
| Membrane                     | 354             |
| Cytoplasm                    | 331             |
| Extracellular exosome        | 309             |
| Mitochondrion                | 228             |
| Nucleus                      | 228             |
| Mitochondrial inner membrane | 130             |
| Cytosol                      | 95              |
| Cytoskeleton                 | 83              |
| Myelin sheath                | 80              |
| Focal adhesion               | 78              |

13

14 **Supplementary Table 2: Lists of particularly responsive proteins in soleus (Sol)**  
15 **and extensor digitorum longus (EDL) muscles to microgravity ( $\mu$ -g) exposure**  
16 **and/or fructo-oligosaccharide (FOS) ingestion.** The protein abundance profiles of the  
17 groups exposed to  $\mu$ -g with and without FOS ingestion and the group exposed to  
18 artificial 1-g (A1-g) with FOS ingestion were individually compared with that of the  
19 group exposed to A1-g without FOS ingestion. The responsive proteins, which are  
20 selected based on *p* values ( $< 0.01$ ) and fold changes ( $> 2.0$ ), in Sol (**a** and **b**) and EDL  
21 (**c** and **d**) are depicted. Additionally, the significant high- and low-abundance of proteins  
22 ( $p < 0.01$ ) are indicated in orange and blue, respectively. Any protein in the group  
23 exposed to A1-g with FOS ingestion did not meet these criteria.

24

25 **a: The high-abundance of proteins in Sol muscles of mice exposed to  $\mu$ -g exposure**

| Accession                                                                                    | Gene name                                                       | $\mu$ -g & FOS (-)<br>/A1-g & FOS (-) |                      | $\mu$ -g & FOS (+)<br>/A1-g & FOS (-) |                      |
|----------------------------------------------------------------------------------------------|-----------------------------------------------------------------|---------------------------------------|----------------------|---------------------------------------|----------------------|
|                                                                                              |                                                                 | Fold<br>change                        | <i>P</i> value       | Fold<br>change                        | <i>P</i> value       |
| <b>The responsive proteins to <math>\mu</math>-g exposure with and without FOS ingestion</b> |                                                                 |                                       |                      |                                       |                      |
| Q8BGT5                                                                                       | Alanine aminotransferase 2 (Gpt2)                               | Infinity                              | $9.3 \times 10^{-9}$ | Infinity                              | $4.5 \times 10^{-8}$ |
| Q9DBD0                                                                                       | Inhibitor of carbonic anhydrase<br>(Ica)                        | 16.78                                 | $2.2 \times 10^{-4}$ | 19.79                                 | $2.8 \times 10^{-4}$ |
| Q9D1A4                                                                                       | Ankyrin repeat and SOCS box<br>protein 5 (Asb5)                 | 13.75                                 | $1.6 \times 10^{-3}$ | 20.76                                 | $7.3 \times 10^{-4}$ |
| P14231                                                                                       | Sodium/potassium-transporting<br>ATPase subunit beta-2 (Atp1b2) | 13.52                                 | $6.6 \times 10^{-3}$ | 8.84                                  | $7.3 \times 10^{-4}$ |
| Q64726                                                                                       | Zinc-alpha-2-glycoprotein (Azgp1)                               | 9.08                                  | $2.2 \times 10^{-3}$ | 6.95                                  | $9.0 \times 10^{-4}$ |

|        |                                                         |      |                      |       |                      |
|--------|---------------------------------------------------------|------|----------------------|-------|----------------------|
| P11859 | Angiotensinogen (Agt)                                   | 8.79 | $3.4 \times 10^{-4}$ | 14.66 | $1.3 \times 10^{-4}$ |
| P19182 | Interferon-related developmental regulator 1 (Ifrd1)    | 8.21 | $3.3 \times 10^{-4}$ | 10.16 | $6.7 \times 10^{-5}$ |
| Q8BUZ1 | Actin-binding Rho-activating protein (Abra)             | 7.10 | $2.4 \times 10^{-4}$ | 7.71  | $1.9 \times 10^{-4}$ |
| P20918 | Plasminogen (Plg)                                       | 6.06 | $2.5 \times 10^{-4}$ | 8.12  | $3.5 \times 10^{-4}$ |
| P49182 | Heparin cofactor 2 (Serpind1)                           | 5.84 | $2.6 \times 10^{-4}$ | 7.81  | $3.2 \times 10^{-4}$ |
| P06330 | Ig heavy chain V region AC38 205.12                     | 5.79 | $4.0 \times 10^{-3}$ | 9.68  | $2.2 \times 10^{-3}$ |
| Q00724 | Retinol-binding protein 4 (Rbp4)                        | 5.69 | $1.4 \times 10^{-3}$ | 9.36  | $2.2 \times 10^{-4}$ |
| P29699 | Alpha-2-HS-glycoprotein (Ahsg)                          | 5.24 | $1.5 \times 10^{-4}$ | 7.18  | $4.4 \times 10^{-4}$ |
| P22599 | Alpha-1-antitrypsin 1-2 (Serpina1b)                     | 5.07 | $2.7 \times 10^{-4}$ | 6.43  | $5.9 \times 10^{-4}$ |
| Q01339 | Beta-2-glycoprotein 1 (ApoH)                            | 4.97 | $1.4 \times 10^{-4}$ | 6.37  | $1.0 \times 10^{-4}$ |
| P06728 | Apolipoprotein A-IV (ApoA4)                             | 4.82 | $4.8 \times 10^{-4}$ | 5.97  | $2.9 \times 10^{-4}$ |
| Q5SX39 | Myosin-4 (Myh4)                                         | 4.78 | $7.1 \times 10^{-4}$ | 3.95  | $2.4 \times 10^{-3}$ |
| P07724 | Serum albumin (Alb)                                     | 4.77 | $5.1 \times 10^{-4}$ | 6.58  | $1.0 \times 10^{-3}$ |
| P21614 | Vitamin D-binding protein (Gc)                          | 4.62 | $7.3 \times 10^{-4}$ | 6.50  | $1.6 \times 10^{-3}$ |
| Q61696 | Heat shock 70 kDa protein 1A (Hspa1a)                   | 4.58 | $3.3 \times 10^{-3}$ | 6.06  | $2.4 \times 10^{-4}$ |
| P01027 | Complement C3 (C3)                                      | 4.48 | $4.8 \times 10^{-4}$ | 5.31  | $7.5 \times 10^{-4}$ |
| Q61147 | Ceruloplasmin (Cp)                                      | 4.31 | $1.1 \times 10^{-3}$ | 6.19  | $9.1 \times 10^{-4}$ |
| P07309 | Transthyretin (Trt)                                     | 4.28 | $2.0 \times 10^{-3}$ | 6.16  | $1.6 \times 10^{-3}$ |
| Q07456 | Protein AMBP (Ambp)                                     | 4.27 | $1.0 \times 10^{-3}$ | 5.46  | $2.4 \times 10^{-3}$ |
| P07759 | Serine protease inhibitor A3K (Serpina3k)               | 4.22 | $4.0 \times 10^{-4}$ | 5.16  | $5.9 \times 10^{-4}$ |
| P23953 | Carboxylesterase 1C (Ces1c)                             | 4.17 | $3.3 \times 10^{-4}$ | 6.44  | $5.7 \times 10^{-4}$ |
| Q61702 | Inter-alpha-trypsin inhibitor heavy chain H1 (Itih1)    | 4.12 | $1.5 \times 10^{-3}$ | 6.02  | $2.3 \times 10^{-5}$ |
| Q8BG71 | tRNA tryptophan-synthetizing protein 2 homolog (Trmt12) | 4.08 | $4.3 \times 10^{-4}$ | 2.58  | $8.1 \times 10^{-3}$ |
| Q91X72 | Hemopexin (Hpx)                                         | 4.08 | $7.5 \times 10^{-3}$ | 6.89  | $5.8 \times 10^{-3}$ |
| P52430 | Serum paraoxonase/arylesterase 1 (Pon1)                 | 3.86 | $1.6 \times 10^{-3}$ | 5.20  | $8.9 \times 10^{-4}$ |
| P29788 | Vitronectin (Vtn)                                       | 3.85 | $2.6 \times 10^{-3}$ | 10.03 | $4.5 \times 10^{-4}$ |

|        |                                                                       |      |                      |      |                      |
|--------|-----------------------------------------------------------------------|------|----------------------|------|----------------------|
| Q921I1 | Serotransferrin (Tf)                                                  | 3.85 | $2.8 \times 10^{-3}$ | 4.94 | $4.3 \times 10^{-3}$ |
| Q00897 | Alpha-1-antitrypsin 1-4<br>(Serpina1d)                                | 3.79 | $4.1 \times 10^{-4}$ | 4.31 | $3.9 \times 10^{-4}$ |
| Q9JHG6 | Calcipressin-1 (Rcan1)                                                | 3.75 | $2.5 \times 10^{-5}$ | 5.92 | $6.7 \times 10^{-5}$ |
| P01029 | Complement C4-B (C4b)                                                 | 3.69 | $3.1 \times 10^{-4}$ | 5.06 | $2.6 \times 10^{-4}$ |
| Q8VCG4 | Complement component C8<br>gamma chain (C8g)                          | 3.60 | $4.9 \times 10^{-4}$ | 3.95 | $3.8 \times 10^{-3}$ |
| Q61703 | Inter-alpha-trypsin inhibitor heavy<br>chain H2 (Itih2)               | 3.58 | $4.0 \times 10^{-3}$ | 4.97 | $2.4 \times 10^{-3}$ |
| P70665 | Sialate O-acetyltransferase (Siae)                                    | 3.57 | $9.7 \times 10^{-5}$ | 3.46 | $9.4 \times 10^{-3}$ |
| E9PV24 | Fibrinogen alpha chain (Fga)                                          | 3.46 | $9.0 \times 10^{-3}$ | 3.49 | $8.9 \times 10^{-3}$ |
| Q9DBB9 | Carboxypeptidase N subunit 2<br>(Cpn2)                                | 3.42 | $6.3 \times 10^{-3}$ | 3.93 | $6.6 \times 10^{-3}$ |
| O08677 | Kininogen-1 (Kng1)                                                    | 3.38 | $3.3 \times 10^{-4}$ | 4.72 | $1.4 \times 10^{-3}$ |
| Q8K0E8 | Fibrinogen beta chain (Fgb)                                           | 3.36 | $2.8 \times 10^{-3}$ | 3.45 | $2.2 \times 10^{-3}$ |
| Q61129 | Complement factor I (Cfi)                                             | 3.27 | $1.2 \times 10^{-3}$ | 4.54 | $2.5 \times 10^{-3}$ |
| Q61247 | Alpha-2-antiplasmin (Serpinf2)                                        | 3.07 | $1.3 \times 10^{-3}$ | 3.64 | $3.8 \times 10^{-3}$ |
| P06909 | Complement factor H (Cfh)                                             | 3.04 | $2.5 \times 10^{-3}$ | 4.46 | $1.3 \times 10^{-3}$ |
| P28665 | Murinoglobulin-1 (Mug1)                                               | 2.97 | $1.2 \times 10^{-3}$ | 4.25 | $1.1 \times 10^{-3}$ |
| P46412 | Glutathione peroxidase 3 (Gpx3)                                       | 2.89 | $9.4 \times 10^{-4}$ | 3.55 | $1.2 \times 10^{-4}$ |
| P13707 | Glycerol-3-phosphate<br>dehydrogenase [NAD(+)],<br>cytoplasmic (Gpd1) | 2.87 | $2.4 \times 10^{-4}$ | 2.69 | $4.4 \times 10^{-4}$ |
| P10107 | Annexin A1 (Anxa1)                                                    | 2.78 | $6.7 \times 10^{-4}$ | 2.50 | $6.4 \times 10^{-3}$ |
| P40936 | Indolethylamine N-<br>methyltransferase (Inmt)                        | 2.56 | $4.5 \times 10^{-4}$ | 2.82 | $7.9 \times 10^{-4}$ |
| P97290 | Plasma protease C1 inhibitor<br>(Serping1)                            | 2.55 | $6.0 \times 10^{-3}$ | 3.72 | $2.6 \times 10^{-3}$ |
| P97737 | Growth/differentiation factor 10<br>(Gdf10)                           | 2.51 | $4.2 \times 10^{-3}$ | 2.78 | $2.4 \times 10^{-3}$ |
| Q00623 | Apolipoprotein A-I (Apoa1)                                            | 2.41 | $2.6 \times 10^{-3}$ | 2.72 | $2.6 \times 10^{-3}$ |
| Q80XB4 | Nebulin-related-anchoring protein<br>(Nrap)                           | 2.30 | $1.3 \times 10^{-3}$ | 2.42 | $5.5 \times 10^{-4}$ |
| Q06890 | Clusterin (Clu)                                                       | 2.23 | $1.3 \times 10^{-3}$ | 3.05 | $1.6 \times 10^{-3}$ |

|                                                                                     |                                                                                  |          |                      |          |                      |
|-------------------------------------------------------------------------------------|----------------------------------------------------------------------------------|----------|----------------------|----------|----------------------|
| P63328                                                                              | Serine/threonine-protein phosphatase 2B catalytic subunit alpha isoform (Ppp3ca) | 2.16     | $4.7 \times 10^{-4}$ | 2.28     | $3.6 \times 10^{-3}$ |
| Q99JI1                                                                              | Musculoskeletal embryonic nuclear protein 1 (Mustn1)                             | 2.00     | $9.2 \times 10^{-3}$ | 2.48     | $5.8 \times 10^{-4}$ |
| <b>The responsive proteins to <math>\mu</math>-g exposure without FOS ingestion</b> |                                                                                  |          |                      |          |                      |
| P01786                                                                              | Ig heavy chain V region MOPC 47A                                                 | Infinity | $1.2 \times 10^{-3}$ | Infinity | $1.2 \times 10^{-1}$ |
| Q8VD04                                                                              | GRIP1-associated protein 1 (Gripap1)                                             | 61.34    | $9.7 \times 10^{-3}$ | 46.63    | $1.2 \times 10^{-2}$ |
| P09041                                                                              | Phosphoglycerate kinase 2 (Pgk2)                                                 | 3.04     | $3.7 \times 10^{-3}$ | 2.97     | $1.1 \times 10^{-2}$ |
| O88990                                                                              | Alpha-actinin-3 (Actn3)                                                          | 2.66     | $3.7 \times 10^{-5}$ | 1.82     | $1.4 \times 10^{-3}$ |
| Q91WS7                                                                              | DEP domain-containing protein 7 (Depdc7)                                         | 2.46     | $7.0 \times 10^{-3}$ | 1.71     | $1.1 \times 10^{-1}$ |
| Q9JHR7                                                                              | Insulin-degrading enzyme (Ide)                                                   | 2.32     | $6.0 \times 10^{-3}$ | 2.23     | $1.3 \times 10^{-2}$ |
| Q9D2G5                                                                              | Synaptojanin-2 (Synj2)                                                           | 2.16     | $8.3 \times 10^{-3}$ | 2.13     | $2.5 \times 10^{-2}$ |
| O55047                                                                              | Serine/threonine-protein kinase tousled-like 2 (Tlk2)                            | 2.13     | $3.2 \times 10^{-3}$ | 1.57     | $3.3 \times 10^{-2}$ |
| P32848                                                                              | Parvalbumin alpha (Pvalb)                                                        | 2.05     | $4.1 \times 10^{-3}$ | 2.60     | $3.1 \times 10^{-2}$ |
| Q91WP6                                                                              | Serine protease inhibitor A3N (Serpina3n)                                        | 2.05     | $2.0 \times 10^{-3}$ | 1.76     | $2.3 \times 10^{-2}$ |
| P07901                                                                              | Heat shock protein HSP 90-alpha (Hsp90aa1)                                       | 2.03     | $3.0 \times 10^{-3}$ | 2.56     | $1.4 \times 10^{-2}$ |
| <b>The responsive proteins to <math>\mu</math>-g exposure with FOS ingestion</b>    |                                                                                  |          |                      |          |                      |
| Q9CR42                                                                              | Ankyrin repeat domain-containing protein 1 (Ankrd1)                              | 8.64     | $1.1 \times 10^{-2}$ | 11.38    | $7.9 \times 10^{-3}$ |
| P17879                                                                              | Heat shock 70 kDa protein 1B (Hspa1b)                                            | 5.33     | $1.8 \times 10^{-2}$ | 7.76     | $4.5 \times 10^{-3}$ |
| P01868                                                                              | Ig gamma-1 chain C region secreted form (Ighg1)                                  | 5.87     | $1.7 \times 10^{-2}$ | 6.29     | $6.1 \times 10^{-4}$ |
| Q8VCM7                                                                              | Fibrinogen gamma chain (Fgg)                                                     | 3.81     | $1.1 \times 10^{-2}$ | 4.08     | $8.6 \times 10^{-3}$ |
| Q80YC5                                                                              | Coagulation factor XII (F12)                                                     | 2.09     | $1.1 \times 10^{-2}$ | 3.67     | $6.8 \times 10^{-4}$ |
| P01644                                                                              | Ig kappa chain V-V region HP R16.7                                               | 1.92     | $1.9 \times 10^{-4}$ | 2.85     | $7.8 \times 10^{-3}$ |

|        |                                                               |      |                      |      |                      |
|--------|---------------------------------------------------------------|------|----------------------|------|----------------------|
| P70695 | Fructose-1,6-bisphosphatase isozyme 2 (Fbp2)                  | 2.46 | $1.5 \times 10^{-2}$ | 2.71 | $2.4 \times 10^{-3}$ |
| Q9WVD5 | Mitochondrial ornithine transporter 1 (Slc25a15)              | 2.08 | $1.6 \times 10^{-2}$ | 2.51 | $6.8 \times 10^{-3}$ |
| P19157 | Glutathione S-transferase P 1 (Gstp1)                         | 1.82 | $9.9 \times 10^{-4}$ | 2.50 | $1.4 \times 10^{-3}$ |
| P32261 | Antithrombin-III (Serpinc1)                                   | 2.49 | $1.1 \times 10^{-2}$ | 2.46 | $5.1 \times 10^{-3}$ |
| Q9QUR7 | Peptidyl-prolyl cis-trans isomerase NIMA-interacting 1 (Pin1) | 1.32 | $5.3 \times 10^{-2}$ | 2.30 | $6.8 \times 10^{-4}$ |
| P04186 | Complement factor B (Cfb)                                     | 1.98 | $2.8 \times 10^{-3}$ | 2.22 | $2.8 \times 10^{-3}$ |
| P17563 | Methanethiol oxidase (Selenbp1)                               | 1.57 | $4.1 \times 10^{-5}$ | 2.18 | $6.4 \times 10^{-4}$ |
| P10649 | Glutathione S-transferase Mu 1 (Gstm1)                        | 1.91 | $1.5 \times 10^{-4}$ | 2.02 | $3.4 \times 10^{-4}$ |

26

27

**b: The low-abundance of proteins in Sol muscles of mice exposed to  $\mu$ -g exposure**

| Accession                                                                                    | Gene name                                                  | $\mu$ -g & FOS (-)<br>/A1-g & FOS (-) |                      | $\mu$ -g & FOS (+)<br>/A1-g & FOS (-) |                      |
|----------------------------------------------------------------------------------------------|------------------------------------------------------------|---------------------------------------|----------------------|---------------------------------------|----------------------|
|                                                                                              |                                                            | Fold change                           | P value              | Fold change                           | P value              |
| <b>The responsive proteins to <math>\mu</math>-g exposure with and without FOS ingestion</b> |                                                            |                                       |                      |                                       |                      |
| Q9R0H0                                                                                       | Peroxisomal acyl-coenzyme A oxidase 1 (Acox1)              | 0.15                                  | $8.0 \times 10^{-4}$ | 0.20                                  | $1.9 \times 10^{-3}$ |
| Q80TJ7                                                                                       | Histone lysine demethylase PHF8 (Phf8)                     | 0.18                                  | $1.1 \times 10^{-3}$ | 0.23                                  | $1.4 \times 10^{-4}$ |
| P13705                                                                                       | DNA mismatch repair protein (Msh3)                         | 0.21                                  | $2.2 \times 10^{-4}$ | 0.28                                  | $9.7 \times 10^{-4}$ |
| Q9CRB8                                                                                       | Mitochondrial fission process protein 1 (Mtfp1)            | 0.22                                  | $1.0 \times 10^{-3}$ | 0.36                                  | $1.6 \times 10^{-3}$ |
| Q80XN0                                                                                       | D-beta-hydroxybutyrate dehydrogenase, mitochondrial (Bdh1) | 0.30                                  | $1.6 \times 10^{-3}$ | 0.40                                  | $6.1 \times 10^{-3}$ |
| P13542                                                                                       | Myosin-8 (Myh8)                                            | 0.30                                  | $5.4 \times 10^{-4}$ | 0.36                                  | $4.4 \times 10^{-4}$ |
| Q2TPA8                                                                                       | Hydroxysteroid dehydrogenase-like protein 2 (Hsd12)        | 0.34                                  | $5.8 \times 10^{-4}$ | 0.44                                  | $1.5 \times 10^{-3}$ |
| O88746                                                                                       | Target of Myb protein 1 (Tom1)                             | 0.35                                  | $4.2 \times 10^{-4}$ | 0.43                                  | $5.3 \times 10^{-4}$ |

|                                                                                     |                                                                        |      |                      |      |                      |
|-------------------------------------------------------------------------------------|------------------------------------------------------------------------|------|----------------------|------|----------------------|
| A2AQP0                                                                              | Myosin-7B (Myh7b)                                                      | 0.36 | $2.3 \times 10^{-3}$ | 0.44 | $2.5 \times 10^{-3}$ |
| Q8CC35                                                                              | Synaptopodin (Synpo)                                                   | 0.37 | $1.6 \times 10^{-4}$ | 0.40 | $5.8 \times 10^{-4}$ |
| P56213                                                                              | FAD-linked sulfhydryl oxidase<br>ALR (Gfer)                            | 0.38 | $2.4 \times 10^{-3}$ | 0.33 | $1.8 \times 10^{-3}$ |
| O35459                                                                              | Delta(3,5)-Delta(2,4)-dienoyl-CoA<br>isomerase, mitochondrial (Ech1)   | 0.38 | $6.1 \times 10^{-4}$ | 0.46 | $1.1 \times 10^{-3}$ |
| Q5EBG6                                                                              | Heat shock protein beta-6 (Hspb6)                                      | 0.38 | $5.7 \times 10^{-4}$ | 0.41 | $1.7 \times 10^{-4}$ |
| Q8CI43                                                                              | Myosin light chain 6B (Myl6b)                                          | 0.43 | $6.3 \times 10^{-3}$ | 0.47 | $3.6 \times 10^{-3}$ |
| <b>The responsive proteins to <math>\mu</math>-g exposure without FOS ingestion</b> |                                                                        |      |                      |      |                      |
| P97355                                                                              | Spermine synthase (Sms)                                                | 0.13 | $4.7 \times 10^{-3}$ | 2.09 | $9.4 \times 10^{-1}$ |
| Q6W8Q3                                                                              | Purkinje cell protein 4-like protein<br>1 (Pcp411)                     | 0.15 | $4.2 \times 10^{-4}$ | 0.12 | $2.4 \times 10^{-2}$ |
| Q9CQE8                                                                              | RNA transcription, translation and<br>transport factor protein (Rtraf) | 0.30 | $8.8 \times 10^{-3}$ | 0.52 | $1.4 \times 10^{-1}$ |
| Q99NB1                                                                              | Acetyl-coenzyme A synthetase 2-<br>like, mitochondrial (Acss1)         | 0.36 | $9.7 \times 10^{-4}$ | 0.54 | $5.4 \times 10^{-3}$ |
| Q9R0Q7                                                                              | Prostaglandin E synthase 3 (Ptges3)                                    | 0.40 | $5.1 \times 10^{-3}$ | 0.25 | $3.1 \times 10^{-2}$ |
| Q8R3Q6                                                                              | Coiled-coil domain-containing<br>protein 58 (Ccde58)                   | 0.43 | $2.9 \times 10^{-3}$ | 0.53 | $1.9 \times 10^{-2}$ |
| Q9CZR8                                                                              | Elongation factor Ts, mitochondrial<br>(Tsfm)                          | 0.44 | $1.3 \times 10^{-3}$ | 0.70 | $4.2 \times 10^{-2}$ |
| Q8K4G5                                                                              | Actin-binding LIM protein 1<br>(Ablim1)                                | 0.44 | $1.0 \times 10^{-3}$ | 0.52 | $1.1 \times 10^{-2}$ |
| O35678                                                                              | Monoglyceride lipase (Mgll)                                            | 0.44 | $2.0 \times 10^{-3}$ | 0.73 | $1.2 \times 10^{-2}$ |
| Q8VCW8                                                                              | Medium-chain acyl-CoA ligase<br>ACSF2, mitochondrial (Acsf2)           | 0.45 | $7.7 \times 10^{-4}$ | 0.63 | $3.4 \times 10^{-2}$ |
| Q9CYH2                                                                              | Peroxiredoxin-like 2A (Prxl2a)                                         | 0.46 | $3.0 \times 10^{-4}$ | 0.73 | $4.1 \times 10^{-2}$ |
| P34914                                                                              | Bifunctional epoxide hydrolase 2<br>(Ephx2)                            | 0.48 | $5.4 \times 10^{-4}$ | 0.60 | $9.9 \times 10^{-4}$ |
| P23927                                                                              | Alpha-crystallin B chain (Cryab)                                       | 0.48 | $1.1 \times 10^{-3}$ | 0.54 | $1.7 \times 10^{-5}$ |
| Q99P30                                                                              | Peroxisomal coenzyme A<br>diphosphatase (Nudt7)                        | 0.49 | $8.2 \times 10^{-4}$ | 0.53 | $1.0 \times 10^{-2}$ |
| P24270                                                                              | Catalase (Cat)                                                         | 0.49 | $3.5 \times 10^{-3}$ | 0.62 | $1.0 \times 10^{-2}$ |
| Q8VDN2                                                                              | Sodium/potassium-transporting<br>ATPase subunit alpha-1 (Atp1a1)       | 0.49 | $6.7 \times 10^{-3}$ | 0.55 | $1.6 \times 10^{-2}$ |

| The responsive proteins to $\mu$ -g exposure with FOS ingestion |                                                 |      |                      |      |                      |
|-----------------------------------------------------------------|-------------------------------------------------|------|----------------------|------|----------------------|
| Q61398                                                          | Procollagen C-endopeptidase enhancer 1 (Pcolce) | 0.24 | $6.1 \times 10^{-2}$ | 0.12 | $4.9 \times 10^{-3}$ |
| P43025                                                          | Tetranectin (Clec3b)                            | 0.04 | $4.0 \times 10^{-2}$ | 0.23 | $3.7 \times 10^{-3}$ |
| P08030                                                          | Adenine phosphoribosyltransferase (Aprt)        | 0.51 | $3.2 \times 10^{-2}$ | 0.37 | $4.1 \times 10^{-3}$ |
| P62270                                                          | 40S ribosomal protein S18 (Rps18)               | 0.29 | $3.7 \times 10^{-2}$ | 0.40 | $5.6 \times 10^{-3}$ |
| Q9EQK5                                                          | Major vault protein (Mvp)                       | 0.32 | $1.6 \times 10^{-2}$ | 0.40 | $6.6 \times 10^{-3}$ |
| P63024                                                          | Vesicle-associated membrane protein 3 (Vamp3)   | 0.86 | $4.8 \times 10^{-1}$ | 0.42 | $4.4 \times 10^{-3}$ |
| P27546                                                          | Microtubule-associated protein 4 (Map4)         | 0.53 | $3.5 \times 10^{-2}$ | 0.46 | $2.3 \times 10^{-3}$ |
| Q62009                                                          | Periostin (Postn)                               | 0.53 | $3.4 \times 10^{-3}$ | 0.46 | $4.9 \times 10^{-3}$ |
| Q99LP6                                                          | GrpE protein homolog 1, mitochondrial (Grpel1)  | 0.51 | $4.3 \times 10^{-2}$ | 0.48 | $2.0 \times 10^{-3}$ |
| Q9D5V5                                                          | Cullin-5 (Cul5)                                 | 0.59 | $9.9 \times 10^{-4}$ | 0.49 | $5.4 \times 10^{-3}$ |

28

29

**c: The high-abundance of proteins in EDL muscles of mice exposed to  $\mu$ -g exposure**

| Accession                                                                           | Gene name                                                                             | $\mu$ -g & FOS (-)<br>/A1-g & FOS (-) |                      | $\mu$ -g & FOS (+)<br>/A1-g & FOS (-) |                      |
|-------------------------------------------------------------------------------------|---------------------------------------------------------------------------------------|---------------------------------------|----------------------|---------------------------------------|----------------------|
|                                                                                     |                                                                                       | Fold change                           | P value              | Fold change                           | P value              |
| <b>The responsive proteins to <math>\mu</math>-g exposure without FOS ingestion</b> |                                                                                       |                                       |                      |                                       |                      |
| O70571                                                                              | [Pyruvate dehydrogenase (acetyl-transferring)] kinase isozyme 4, mitochondrial (Pdk4) | 2.82                                  | $8.7 \times 10^{-3}$ | 3.42                                  | $1.0 \times 10^{-2}$ |
| <b>The responsive proteins to <math>\mu</math>-g exposure with FOS ingestion</b>    |                                                                                       |                                       |                      |                                       |                      |
| Q7TSI1                                                                              | Pleckstrin homology domain-containing family M member 1 (Plekhm1)                     | Infinity                              | $1.2 \times 10^{-1}$ | Infinity                              | $4.8 \times 10^{-7}$ |
| Q9DBB9                                                                              | Carboxypeptidase N subunit 2 (Cpn2)                                                   | 1.00                                  | 1.0                  | Infinity                              | $3.4 \times 10^{-5}$ |
| Q9R0H0                                                                              | Peroxisomal acyl-coenzyme A oxidase 1 (Acox1)                                         | 2.26                                  | $2.7 \times 10^{-2}$ | 3.70                                  | $8.1 \times 10^{-3}$ |
| O89086                                                                              | RNA-binding protein 3 (Rbm3)                                                          | 1.97                                  | $5.5 \times 10^{-4}$ | 2.30                                  | $1.7 \times 10^{-3}$ |



|        |                                            |      |                      |      |                      |
|--------|--------------------------------------------|------|----------------------|------|----------------------|
| Q69ZT9 | TBC1 domain family member 30<br>(Tbc1d30)  | 1.39 | $1.1 \times 10^{-1}$ | 2.23 | $1.2 \times 10^{-3}$ |
| P13705 | DNA mismatch repair protein Msh3<br>(Msh3) | 1.90 | $4.4 \times 10^{-3}$ | 2.16 | $2.8 \times 10^{-3}$ |

30

31 **d: The low-abundance of proteins in EDL muscles of mice exposed to  $\mu$ -g exposure**

| Accession                                                                                    | Gene name                                                                           | $\mu$ -g & FOS (-)<br>/A1-g & FOS (-) |                      | $\mu$ -g & FOS (+)<br>/A1-g & FOS (-) |                      |
|----------------------------------------------------------------------------------------------|-------------------------------------------------------------------------------------|---------------------------------------|----------------------|---------------------------------------|----------------------|
|                                                                                              |                                                                                     | Fold<br>change                        | <i>P</i> value       | Fold<br>change                        | <i>P</i> value       |
| <b>The responsive proteins to <math>\mu</math>-g exposure with and without FOS ingestion</b> |                                                                                     |                                       |                      |                                       |                      |
| P11680                                                                                       | Properdin (Cfp)                                                                     | 0.002                                 | $1.4 \times 10^{-3}$ | 0.001                                 | $1.4 \times 10^{-3}$ |
| <b>The responsive proteins to <math>\mu</math>-g exposure without FOS ingestion</b>          |                                                                                     |                                       |                      |                                       |                      |
| Q8BTM8                                                                                       | Filamin-A (Flna)                                                                    | Infinity                              | $4.8 \times 10^{-5}$ | 0.71                                  | $4.1 \times 10^{-1}$ |
| P47911                                                                                       | 60S ribosomal protein L6 (Rpl6)                                                     | 0.46                                  | $8.6 \times 10^{-4}$ | 0.53                                  | $1.5 \times 10^{-2}$ |
| <b>The responsive proteins to <math>\mu</math>-g exposure with FOS ingestion</b>             |                                                                                     |                                       |                      |                                       |                      |
| Q8VED5                                                                                       | Keratin, type II cytoskeletal 79<br>(Krt79)                                         | 1.04                                  | $5.5 \times 10^{-1}$ | 0.06                                  | $2.5 \times 10^{-3}$ |
| Q8R010                                                                                       | Aminoacyl tRNA synthase<br>complex-interacting<br>multifunctional protein 2 (Aimp2) | 0.58                                  | $5.1 \times 10^{-4}$ | 0.44                                  | $1.4 \times 10^{-3}$ |
| P80318                                                                                       | T-complex protein 1 subunit<br>gamma (Cct3)                                         | 0.61                                  | $1.3 \times 10^{-2}$ | 0.45                                  | $2.8 \times 10^{-3}$ |
| Q8BML9                                                                                       | Glutamine--tRNA ligase (Qars)                                                       | 0.58                                  | $2.5 \times 10^{-3}$ | 0.48                                  | $4.1 \times 10^{-4}$ |
| P31230                                                                                       | Aminoacyl tRNA synthase<br>complex-interacting<br>multifunctional protein 1 (Aimp1) | 0.65                                  | $1.4 \times 10^{-2}$ | 0.49                                  | $2.9 \times 10^{-3}$ |

32

33

34 **Supplementary Table 3: Results of gene ontology analysis for the soleus (Sol)**

35 **muscle proteins, which were significantly affected by microgravity ( $\mu$ -g) exposure.**

36 Gene ontology analysis was performed using DAVID Bioinformatics Resources 6.8.

37 The results for the significant higher- **(a)** and lower-abundance **(b)** of proteins ( $p < 0.01$ )

38 in Sol muscles of mice exposed to  $\mu$ -g without fructo-oligosaccharide (FOS) ingestion

39 than those of mice exposed to artificial 1-g (A1-g) without FOS ingestion are depicted.

40 The indices in biological process and cellular component with Benjamini values less

41 than 0.05 are shown.

42

43 **a: For the high-abundance of proteins in  $\mu$ -g & FOS (-) vs. A1-g & FOS (-) groups**

| <b>Term</b>                                | <b>No. of proteins</b> | <b>Benjamini value</b> |
|--------------------------------------------|------------------------|------------------------|
| <b>Biological process</b>                  |                        |                        |
| Acute-phase response                       | 5                      | $8.80 \times 10^{-3}$  |
| Blood coagulation                          | 9                      | $5.50 \times 10^{-5}$  |
| Carbohydrate metabolic process             | 11                     | $3.60 \times 10^{-4}$  |
| Complement activation, alternative pathway | 4                      | $3.50 \times 10^{-3}$  |
| Complement activation, classical pathway   | 5                      | $3.50 \times 10^{-2}$  |
| Fibrinolysis                               | 5                      | $4.20 \times 10^{-4}$  |
| Gluconeogenesis                            | 6                      | $1.80 \times 10^{-4}$  |
| Glutathione metabolic process              | 6                      | $2.70 \times 10^{-3}$  |
| Glycolytic process                         | 7                      | $5.20 \times 10^{-5}$  |
| Hemostasis                                 | 7                      | $1.90 \times 10^{-4}$  |
| Metabolic process                          | 12                     | $3.00 \times 10^{-2}$  |
| Muscle contraction                         | 5                      | $2.90 \times 10^{-2}$  |
| Negative regulation of fibrinolysis        | 4                      | $1.40 \times 10^{-3}$  |
| Negative regulation of peptidase activity  | 12                     | $8.50 \times 10^{-7}$  |

|                                                                      |    |                        |
|----------------------------------------------------------------------|----|------------------------|
| Organ regeneration                                                   | 5  | $3.50 \times 10^{-2}$  |
| Oxidation-reduction process                                          | 21 | $4.30 \times 10^{-5}$  |
| Phosphorylation                                                      | 14 | $2.90 \times 10^{-2}$  |
| Positive regulation of fast-twitch skeletal muscle fiber contraction | 3  | $1.10 \times 10^{-2}$  |
| Response to peptide hormone                                          | 6  | $1.20 \times 10^{-2}$  |
| Skeletal muscle fiber development                                    | 5  | $3.60 \times 10^{-3}$  |
| <b>Cellular component</b>                                            |    |                        |
| Blood microparticle                                                  | 33 | $1.00 \times 10^{-38}$ |
| Cell surface                                                         | 13 | $1.50 \times 10^{-2}$  |
| Chylomicron                                                          | 3  | $3.40 \times 10^{-2}$  |
| Cytoplasm                                                            | 78 | $1.30 \times 10^{-6}$  |
| Cytosol                                                              | 30 | $3.00 \times 10^{-4}$  |
| Extracellular exosome                                                | 86 | $4.10 \times 10^{-38}$ |
| Extracellular matrix                                                 | 11 | $9.50 \times 10^{-4}$  |
| Extracellular region                                                 | 48 | $5.40 \times 10^{-15}$ |
| Extracellular space                                                  | 56 | $1.00 \times 10^{-24}$ |
| Extracellular vesicle                                                | 5  | $5.50 \times 10^{-3}$  |
| Extrinsic component of external side of plasma membrane              | 3  | $1.50 \times 10^{-2}$  |
| Fibrinogen complex                                                   | 3  | $1.20 \times 10^{-2}$  |
| Glycerol-3-phosphate dehydrogenase complex                           | 3  | $2.30 \times 10^{-3}$  |
| High-density lipoprotein particle                                    | 4  | $5.50 \times 10^{-3}$  |
| Mitochondrion                                                        | 28 | $9.40 \times 10^{-4}$  |
| Myelin sheath                                                        | 9  | $1.10 \times 10^{-3}$  |
| Myosin filament                                                      | 3  | $3.40 \times 10^{-2}$  |
| Protein complex                                                      | 17 | $2.40 \times 10^{-4}$  |
| Sarcomere                                                            | 5  | $2.20 \times 10^{-3}$  |
| Sarcoplasmic reticulum                                               | 5  | $9.10 \times 10^{-3}$  |
| Sperm fibrous sheath                                                 | 3  | $3.80 \times 10^{-2}$  |
| Spherical high-density lipoprotein particle                          | 3  | $1.50 \times 10^{-2}$  |
| Z disc                                                               | 6  | $1.80 \times 10^{-2}$  |

44

45 **b:** For the low-abundance of proteins in  $\mu$ -g & FOS (-) vs. A1-g & FOS (-) groups

| Term | No. of proteins | Benjamini value |
|------|-----------------|-----------------|
|------|-----------------|-----------------|

| <b>Biological process</b>                                |     |                        |
|----------------------------------------------------------|-----|------------------------|
| 2-oxoglutarate metabolic process                         | 5   | $1.90 \times 10^{-3}$  |
| Fatty acid beta-oxidation                                | 15  | $1.90 \times 10^{-15}$ |
| Fatty acid beta-oxidation using acyl-CoA dehydrogenase   | 6   | $1.00 \times 10^{-4}$  |
| Fatty acid metabolic process                             | 20  | $3.40 \times 10^{-13}$ |
| Lipid homeostasis                                        | 5   | $4.20 \times 10^{-2}$  |
| Lipid metabolic process                                  | 21  | $4.40 \times 10^{-6}$  |
| Metabolic process                                        | 26  | $1.20 \times 10^{-9}$  |
| Mitochondrial electron transport, cytochrome c to oxygen | 5   | $3.50 \times 10^{-4}$  |
| NADH metabolic process                                   | 4   | $1.30 \times 10^{-2}$  |
| Oxidation-reduction process                              | 41  | $2.70 \times 10^{-17}$ |
| Respiratory electron transport chain                     | 4   | $4.50 \times 10^{-2}$  |
| Transport                                                | 41  | $1.20 \times 10^{-4}$  |
| Tricarboxylic acid cycle                                 | 10  | $9.80 \times 10^{-10}$ |
| <b>Cellular component</b>                                |     |                        |
| Actin cytoskeleton                                       | 10  | $2.50 \times 10^{-3}$  |
| Contractile fiber                                        | 4   | $1.10 \times 10^{-2}$  |
| Extracellular exosome                                    | 86  | $5.60 \times 10^{-24}$ |
| Extracellular matrix                                     | 11  | $9.20 \times 10^{-3}$  |
| Focal adhesion                                           | 18  | $5.70 \times 10^{-6}$  |
| Mitochondrial inner membrane                             | 46  | $1.10 \times 10^{-33}$ |
| Mitochondrial intermembrane space                        | 9   | $1.20 \times 10^{-5}$  |
| Mitochondrial matrix                                     | 27  | $5.60 \times 10^{-21}$ |
| Mitochondrial nucleoid                                   | 6   | $1.40 \times 10^{-3}$  |
| Mitochondrial respiratory chain complex I                | 11  | $7.00 \times 10^{-10}$ |
| Mitochondrial respiratory chain complex IV               | 6   | $5.10 \times 10^{-6}$  |
| Mitochondrion                                            | 106 | $2.10 \times 10^{-58}$ |
| Myelin sheath                                            | 23  | $6.30 \times 10^{-16}$ |
| Peroxisome                                               | 14  | $1.30 \times 10^{-8}$  |
| Pyruvate dehydrogenase complex                           | 3   | $3.40 \times 10^{-2}$  |
| Respiratory chain                                        | 14  | $3.50 \times 10^{-13}$ |
| Z disc                                                   | 12  | $8.70 \times 10^{-7}$  |

46

47

48 **Supplementary Table 4: Results of gene ontology analysis for the soleus (Sol)**  
 49 **muscle proteins, which were significantly affected by microgravity ( $\mu$ -g) exposure**  
 50 **and fructo-oligosaccharide (FOS) ingestion.** Gene ontology analysis was performed  
 51 using DAVID Bioinformatics Resources 6.8. The results for the significant higher- (a)  
 52 and lower-abundance (b) of proteins ( $p < 0.01$ ) in Sol muscles of mice exposed to  $\mu$ -g  
 53 with FOS ingestion than those of mice exposed to artificial 1-g (A1-g) without FOS  
 54 ingestion are depicted. The indices in biological process and cellular component with  
 55 Benjamini values less than 0.05 are shown.

56

57 **a: For the high-abundance of proteins in  $\mu$ -g & FOS (+) vs. A1-g & FOS (-) groups**

| <b>Term</b>                                  | <b>No. of proteins</b> | <b>Benjamini value</b> |
|----------------------------------------------|------------------------|------------------------|
| <b>Biological process</b>                    |                        |                        |
| Blood coagulation                            | 11                     | $1.20 \times 10^{-6}$  |
| Blood coagulation, fibrin clot formation     | 3                      | $3.70 \times 10^{-2}$  |
| Cellular detoxification of nitrogen compound | 3                      | $1.50 \times 10^{-2}$  |
| Cellular response to drug                    | 6                      | $2.50 \times 10^{-2}$  |
| Complement activation, alternative pathway   | 4                      | $5.80 \times 10^{-3}$  |
| Complement activation, classical pathway     | 6                      | $7.40 \times 10^{-3}$  |
| Fibrinolysis                                 | 6                      | $2.20 \times 10^{-5}$  |
| Gluconeogenesis                              | 6                      | $3.70 \times 10^{-4}$  |
| Glutathione metabolic process                | 9                      | $1.60 \times 10^{-6}$  |
| Hemostasis                                   | 9                      | $1.20 \times 10^{-6}$  |
| Innate immune response                       | 12                     | $2.70 \times 10^{-2}$  |
| Negative regulation of peptidase activity    | 12                     | $1.20 \times 10^{-6}$  |
| Nitrobenzene metabolic process               | 3                      | $2.50 \times 10^{-2}$  |
| Oxidation-reduction process                  | 19                     | $1.30 \times 10^{-3}$  |

|                                                                      |    |                        |
|----------------------------------------------------------------------|----|------------------------|
| Plasminogen activation                                               | 4  | $5.80 \times 10^{-3}$  |
| Positive regulation of fast-twitch skeletal muscle fiber contraction | 3  | $1.50 \times 10^{-2}$  |
| Protein polymerization                                               | 5  | $4.10 \times 10^{-4}$  |
| Response to calcium ion                                              | 6  | $1.70 \times 10^{-2}$  |
| Skeletal muscle fiber development                                    | 6  | $3.80 \times 10^{-4}$  |
| Xenobiotic catabolic process                                         | 4  | $2.10 \times 10^{-3}$  |
| <b>Cellular component</b>                                            |    |                        |
| Blood microparticle                                                  | 33 | $1.50 \times 10^{-37}$ |
| Cell cortex                                                          | 6  | $4.40 \times 10^{-2}$  |
| Cell surface                                                         | 14 | $1.20 \times 10^{-2}$  |
| Chylomicron                                                          | 3  | $4.20 \times 10^{-2}$  |
| Cytoplasm                                                            | 86 | $1.90 \times 10^{-7}$  |
| Cytosol                                                              | 37 | $1.40 \times 10^{-6}$  |
| Extracellular exosome                                                | 91 | $2.80 \times 10^{-38}$ |
| Extracellular matrix                                                 | 12 | $3.50 \times 10^{-4}$  |
| Extracellular region                                                 | 54 | $9.20 \times 10^{-18}$ |
| Extracellular space                                                  | 61 | $7.90 \times 10^{-27}$ |
| Extracellular vesicle                                                | 6  | $6.00 \times 10^{-4}$  |
| Extrinsic component of external side of plasma membrane              | 3  | $1.70 \times 10^{-2}$  |
| Fibrinogen complex                                                   | 4  | $3.50 \times 10^{-4}$  |
| Glycerol-3-phosphate dehydrogenase complex                           | 3  | $2.40 \times 10^{-3}$  |
| High-density lipoprotein particle                                    | 4  | $6.50 \times 10^{-3}$  |
| I band                                                               | 5  | $6.00 \times 10^{-4}$  |
| Mitochondrion                                                        | 30 | $6.00 \times 10^{-4}$  |
| Myelin sheath                                                        | 9  | $1.70 \times 10^{-3}$  |
| Myofibril                                                            | 5  | $3.20 \times 10^{-3}$  |
| Neuron projection                                                    | 10 | $4.40 \times 10^{-2}$  |
| Platelet alpha granule                                               | 3  | $4.90 \times 10^{-2}$  |
| Protein complex                                                      | 18 | $1.60 \times 10^{-4}$  |
| Sarcomere                                                            | 4  | $2.90 \times 10^{-2}$  |
| Sarcoplasmic reticulum                                               | 6  | $1.30 \times 10^{-3}$  |
| Spherical high-density lipoprotein particle                          | 3  | $1.70 \times 10^{-2}$  |
| Z disc                                                               | 10 | $1.40 \times 10^{-5}$  |

59 **b:** For the low-abundance of proteins in  $\mu$ -g & FOS (+) vs. A1-g & FOS (-) groups

| Term                                                   | No. of proteins | Benjamini value        |
|--------------------------------------------------------|-----------------|------------------------|
| <b>Biological process</b>                              |                 |                        |
| Carnitine metabolic process, CoA-linked                | 3               | $5.10 \times 10^{-3}$  |
| Fatty acid beta-oxidation                              | 9               | $3.50 \times 10^{-8}$  |
| Fatty acid beta-oxidation using acyl-CoA dehydrogenase | 5               | $2.70 \times 10^{-4}$  |
| Fatty acid metabolic process                           | 11              | $2.50 \times 10^{-6}$  |
| Lipid homeostasis                                      | 5               | $4.50 \times 10^{-3}$  |
| Lipid metabolic process                                | 12              | $2.60 \times 10^{-3}$  |
| Metabolic process                                      | 16              | $3.40 \times 10^{-6}$  |
| Muscle filament sliding                                | 3               | $2.80 \times 10^{-2}$  |
| Oxidation-reduction process                            | 16              | $2.70 \times 10^{-4}$  |
| Regulation of cholesterol metabolic process            | 3               | $4.40 \times 10^{-2}$  |
| Tricarboxylic acid cycle                               | 4               | $2.60 \times 10^{-2}$  |
| <b>Cellular component</b>                              |                 |                        |
| Axon                                                   | 8               | $3.90 \times 10^{-2}$  |
| Contractile fiber                                      | 3               | $4.90 \times 10^{-2}$  |
| Cytoplasm                                              | 59              | $3.50 \times 10^{-5}$  |
| Extracellular exosome                                  | 44              | $9.50 \times 10^{-11}$ |
| Extracellular matrix                                   | 8               | $1.40 \times 10^{-2}$  |
| Focal adhesion                                         | 10              | $3.50 \times 10^{-3}$  |
| Mitochondrial inner membrane                           | 17              | $8.00 \times 10^{-9}$  |
| Mitochondrial matrix                                   | 13              | $1.00 \times 10^{-8}$  |
| Mitochondrion                                          | 42              | $1.00 \times 10^{-15}$ |
| Myelin sheath                                          | 9               | $1.60 \times 10^{-4}$  |
| Myosin complex                                         | 4               | $3.30 \times 10^{-2}$  |
| Myosin filament                                        | 3               | $2.90 \times 10^{-2}$  |
| Peroxisome                                             | 7               | $1.20 \times 10^{-3}$  |
| Z disc                                                 | 9               | $8.50 \times 10^{-6}$  |

60

61

62 **Supplementary Table 5: Results of gene ontology analysis for the extensor**  
63 **digitorum longus (EDL) muscle proteins, which were significantly affected by**  
64 **microgravity ( $\mu$ -g) exposure.** Gene ontology analysis was performed using DAVID  
65 Bioinformatics Resources 6.8. The results for the significant higher- (a) and lower-  
66 abundance (b) of proteins ( $p < 0.01$ ) in EDL muscles of mice exposed to  $\mu$ -g without  
67 fructo-oligosaccharide (FOS) ingestion than those of mice exposed to artificial 1-g (A1-  
68 g) without FOS ingestion are depicted. The indices in biological process and cellular  
69 component with Benjamini values less than 0.05 are shown.

70

71 **a: For the high-abundance of proteins in  $\mu$ -g & FOS (-) vs. A1-g & FOS (-) groups**

| Term                        | No. of proteins | Benjamini value       |
|-----------------------------|-----------------|-----------------------|
| <b>Biological process</b>   |                 |                       |
| Metabolic process           | 6               | $3.70 \times 10^{-2}$ |
| Oxidation-reduction process | 11              | $2.00 \times 10^{-6}$ |
| Tricarboxylic acid cycle    | 3               | $4.80 \times 10^{-2}$ |
| <b>Cellular component</b>   |                 |                       |
| Extracellular exosome       | 12              | $6.20 \times 10^{-3}$ |
| Mitochondrial matrix        | 4               | $2.80 \times 10^{-2}$ |
| Mitochondrion               | 11              | $2.20 \times 10^{-3}$ |
| Myelin sheath               | 5               | $3.30 \times 10^{-3}$ |

72

73 **b: For the low-abundance of proteins in  $\mu$ -g & FOS (-) vs. A1-g & FOS (-) groups**

| Term                      | No. of proteins | Benjamini value       |
|---------------------------|-----------------|-----------------------|
| <b>Biological process</b> |                 |                       |
| Cytoplasmic translation   | 4               | $7.00 \times 10^{-3}$ |



|                                                    |    |                       |
|----------------------------------------------------|----|-----------------------|
| Translation                                        | 10 | $2.70 \times 10^{-5}$ |
| Translational elongation                           | 4  | $1.20 \times 10^{-2}$ |
| <b>Cellular component</b>                          |    |                       |
| Cell-cell adherens junction                        | 6  | $4.10 \times 10^{-3}$ |
| Cytoplasm                                          | 27 | $1.30 \times 10^{-4}$ |
| Cytoplasmic ribonucleoprotein granule              | 3  | $1.30 \times 10^{-2}$ |
| Cytosol                                            | 14 | $2.10 \times 10^{-4}$ |
| Cytosolic large ribosomal subunit                  | 5  | $3.90 \times 10^{-4}$ |
| Eukaryotic translation elongation factor 1 complex | 2  | $4.30 \times 10^{-2}$ |
| Extracellular exosome                              | 21 | $4.20 \times 10^{-7}$ |
| Extracellular matrix                               | 9  | $2.50 \times 10^{-6}$ |
| Focal adhesion                                     | 11 | $2.30 \times 10^{-7}$ |
| Intracellular                                      | 10 | $2.20 \times 10^{-2}$ |
| Intracellular ribonucleoprotein complex            | 8  | $4.80 \times 10^{-5}$ |
| Melanosome                                         | 4  | $1.00 \times 10^{-2}$ |
| Myelin sheath                                      | 4  | $4.60 \times 10^{-2}$ |
| Nucleolus                                          | 7  | $4.00 \times 10^{-2}$ |
| Nucleus                                            | 22 | $1.10 \times 10^{-2}$ |
| Protein complex                                    | 6  | $4.40 \times 10^{-2}$ |
| Ribosome                                           | 7  | $4.00 \times 10^{-5}$ |

74

75

76 **Supplementary Table 6: Results of gene ontology analysis for the extensor**  
77 **digitorum longus (EDL) muscle proteins, which were significantly affected by**  
78 **microgravity ( $\mu$ -g) exposure and fructo-oligosaccharide (FOS) ingestion.** Gene  
79 ontology analysis was performed using DAVID Bioinformatics Resources 6.8. The  
80 results for the significant higher- (a) and lower-abundance (b) of proteins ( $p < 0.01$ ) in  
81 EDL muscles of mice exposed to  $\mu$ -g with FOS ingestion than those of mice exposed to  
82 artificial 1-g (A1-g) without FOS ingestion are depicted. The indices in biological  
83 process and cellular component with Benjamini values less than 0.05 are shown.

84

85 **a: For the high-abundance of proteins in  $\mu$ -g & FOS (+) vs. A1-g & FOS (-) groups**

| <b>Term</b>                 | <b>No. of proteins</b> | <b>Benjamini value</b> |
|-----------------------------|------------------------|------------------------|
| <b>Biological process</b>   |                        |                        |
| Oxidation-reduction process | 12                     | $7.20 \times 10^{-4}$  |
| Tricarboxylic acid cycle    | 4                      | $1.20 \times 10^{-2}$  |
| <b>Cellular component</b>   |                        |                        |
| Blood microparticle         | 5                      | $1.40 \times 10^{-2}$  |
| Cytoplasm                   | 34                     | $4.40 \times 10^{-3}$  |
| Extracellular exosome       | 27                     | $5.10 \times 10^{-7}$  |
| Mitochondrion               | 19                     | $5.10 \times 10^{-5}$  |
| Myelin sheath               | 8                      | $5.10 \times 10^{-5}$  |

86

87 **b: For the low-abundance of proteins in  $\mu$ -g & FOS (+) vs. A1-g & FOS (-) groups**

| <b>Term</b>               | <b>No. of proteins</b> | <b>Benjamini value</b> |
|---------------------------|------------------------|------------------------|
| <b>Biological process</b> |                        |                        |
| Protein folding           | 5                      | $4.20 \times 10^{-2}$  |

|                                               |    |                       |
|-----------------------------------------------|----|-----------------------|
| Translation                                   | 15 | $1.50 \times 10^{-9}$ |
| Translational elongation                      | 5  | $1.10 \times 10^{-3}$ |
| tRNA aminoacylation for protein translation   | 5  | $5.60 \times 10^{-4}$ |
| <b>Cellular component</b>                     |    |                       |
| Aminoacyl-tRNA synthetase multienzyme complex | 4  | $2.80 \times 10^{-5}$ |
| Cell body                                     | 4  | $2.40 \times 10^{-2}$ |
| Cell-cell adherens junction                   | 8  | $4.60 \times 10^{-4}$ |
| Cytoplasm                                     | 36 | $4.90 \times 10^{-5}$ |
| Cytosol                                       | 22 | $1.40 \times 10^{-7}$ |
| Cytosolic small ribosomal subunit             | 4  | $5.60 \times 10^{-3}$ |
| Extracellular exosome                         | 29 | $1.70 \times 10^{-9}$ |
| Extracellular matrix                          | 8  | $3.40 \times 10^{-4}$ |
| Focal adhesion                                | 8  | $1.50 \times 10^{-3}$ |
| Intracellular ribonucleoprotein complex       | 7  | $3.40 \times 10^{-3}$ |
| Melanosome                                    | 4  | $2.40 \times 10^{-2}$ |
| Mitochondrion                                 | 13 | $1.90 \times 10^{-2}$ |
| Myelin sheath                                 | 5  | $1.90 \times 10^{-2}$ |
| Polysome                                      | 3  | $4.80 \times 10^{-2}$ |
| Ribosome                                      | 5  | $1.90 \times 10^{-2}$ |
| Small ribosomal subunit                       | 3  | $2.40 \times 10^{-2}$ |

88

89

90 **Supplementary Table 7: Responses of soleus (Sol) and extensor digitorum longus**  
91 **(EDL) muscle proteins categorized as the components of blood microparticle,**  
92 **extracellular exosome, and extracellular vesicle to microgravity ( $\mu$ -g) or artificial**  
93 **1-g (A1-g) exposure and/or fructo-oligosaccharide (FOS) ingestion.** The protein  
94 abundance profiles of the groups exposed to  $\mu$ -g with and without FOS ingestion and  
95 the group exposed to A1-g with FOS ingestion were individually compared with that of  
96 the group exposed to A1-g without FOS ingestion. The results for the proteins, which  
97 were categorized as the components of blood microparticle, extracellular exosome,  
98 and/or extracellular vesicle by DAVID Bioinformatics Resources 6.8 and significantly  
99 ( $p < 0.01$ ) affected by  $\mu$ -g exposure and/or FOS ingestion, in Sol (a) and EDL (b)  
100 muscles are indicated. The significant high- and low-abundance of proteins are  
101 indicated in orange and blue, respectively.

102

103 **a: The proteins in Sol muscles**

| Accession | Gene name                               | $\mu$ -g & FOS (-)<br>/A1-g & FOS (-) |                      | $\mu$ -g & FOS (+)<br>/A1-g & FOS (-) |                      | A1-g & FOS (+)<br>/A1-g & FOS (-) |                      |
|-----------|-----------------------------------------|---------------------------------------|----------------------|---------------------------------------|----------------------|-----------------------------------|----------------------|
|           |                                         | Fold change                           | <i>P</i> value       | Fold change                           | <i>P</i> value       | Fold change                       | <i>P</i> value       |
| Q8VD04    | GRIP1 associated protein 1<br>(Gripap1) | 61.34                                 | $9.7 \times 10^{-3}$ | 46.63                                 | $1.2 \times 10^{-2}$ | 2.12                              | $8.5 \times 10^{-1}$ |
| Q64726    | Alpha-2-glycoprotein 1, zinc<br>(Azgp1) | 9.08                                  | $2.2 \times 10^{-3}$ | 6.95                                  | $9.0 \times 10^{-4}$ | 1.41                              | $6.9 \times 10^{-1}$ |

|        |                                                                          |      |                      |       |                      |      |                      |
|--------|--------------------------------------------------------------------------|------|----------------------|-------|----------------------|------|----------------------|
| P11859 | Angiotensinogen (serpin peptidase inhibitor, clade A, member 8) (Agt)    | 8.79 | $3.4 \times 10^{-4}$ | 14.66 | $1.3 \times 10^{-4}$ | 0.94 | $8.3 \times 10^{-1}$ |
| P20918 | Plasminogen (Plg)                                                        | 6.06 | $2.5 \times 10^{-4}$ | 8.12  | $3.5 \times 10^{-4}$ | 0.99 | $9.6 \times 10^{-1}$ |
| P49182 | Serine (or cysteine) peptidase inhibitor, clade D, member 1 (Serpind1)   | 5.84 | $2.6 \times 10^{-4}$ | 7.81  | $3.2 \times 10^{-4}$ | 0.69 | $1.2 \times 10^{-1}$ |
| Q00724 | Retinol binding protein 4, plasma (Rbp4)                                 | 5.69 | $1.4 \times 10^{-3}$ | 9.36  | $2.2 \times 10^{-4}$ | 0.92 | $7.3 \times 10^{-1}$ |
| P29699 | Alpha-2-HS-glycoprotein (Ahsg)                                           | 5.24 | $1.5 \times 10^{-4}$ | 7.18  | $4.4 \times 10^{-4}$ | 0.80 | $1.9 \times 10^{-1}$ |
| P22599 | Serine (or cysteine) peptidase inhibitor, clade A, member 1B (Serpina1b) | 5.07 | $2.7 \times 10^{-4}$ | 6.43  | $5.9 \times 10^{-4}$ | 0.88 | $4.5 \times 10^{-1}$ |
| Q01339 | Apolipoprotein H (ApoH)                                                  | 4.97 | $1.4 \times 10^{-4}$ | 6.37  | $1.0 \times 10^{-4}$ | 0.74 | $8.3 \times 10^{-2}$ |
| P06728 | Apolipoprotein A-IV (ApoA4)                                              | 4.82 | $4.8 \times 10^{-4}$ | 5.97  | $2.9 \times 10^{-4}$ | 0.64 | $5.9 \times 10^{-2}$ |
| P07724 | Albumin (Alb)                                                            | 4.77 | $5.1 \times 10^{-4}$ | 6.58  | $1.0 \times 10^{-3}$ | 0.99 | $9.9 \times 10^{-1}$ |
| P21614 | Group specific component (Gc)                                            | 4.62 | $7.3 \times 10^{-4}$ | 6.50  | $1.6 \times 10^{-3}$ | 0.85 | $3.8 \times 10^{-1}$ |
| Q61696 | Heat shock protein 1A (Hspa1a)                                           | 4.58 | $3.3 \times 10^{-3}$ | 6.06  | $2.4 \times 10^{-4}$ | 1.12 | $4.6 \times 10^{-1}$ |
| P01027 | Complement component 3 (C3)                                              | 4.48 | $4.8 \times 10^{-4}$ | 5.31  | $7.5 \times 10^{-4}$ | 1.02 | $9.0 \times 10^{-1}$ |
| Q61147 | Ceruloplasmin (Cp)                                                       | 4.31 | $1.1 \times 10^{-3}$ | 6.19  | $9.1 \times 10^{-4}$ | 1.01 | $8.8 \times 10^{-1}$ |
| P07309 | Transthyretin (Ttr)                                                      | 4.28 | $2.0 \times 10^{-3}$ | 6.16  | $1.6 \times 10^{-3}$ | 0.87 | $6.7 \times 10^{-1}$ |
| Q07456 | Alpha 1 microglobulin/bikunin (Ambp)                                     | 4.27 | $1.0 \times 10^{-3}$ | 5.46  | $2.4 \times 10^{-3}$ | 0.93 | $7.8 \times 10^{-1}$ |
| P07759 | Serine (or cysteine) peptidase inhibitor, clade A, member 3K (Serpina3k) | 4.22 | $4.0 \times 10^{-4}$ | 5.16  | $5.9 \times 10^{-4}$ | 0.79 | $3.2 \times 10^{-1}$ |
| Q61702 | Inter-alpha trypsin inhibitor, heavy chain 1 (Itih1)                     | 4.12 | $1.5 \times 10^{-3}$ | 6.02  | $2.3 \times 10^{-5}$ | 0.86 | $4.8 \times 10^{-1}$ |
| Q91X72 | Hemopexin (Hpx)                                                          | 4.08 | $7.5 \times 10^{-3}$ | 6.89  | $5.8 \times 10^{-3}$ | 0.97 | $9.3 \times 10^{-1}$ |
| P52430 | Paraoxonase 1 (Pon1)                                                     | 3.86 | $1.6 \times 10^{-3}$ | 5.20  | $8.9 \times 10^{-4}$ | 0.89 | $6.5 \times 10^{-1}$ |
| P29788 | Vitronectin (Vtn)                                                        | 3.85 | $2.6 \times 10^{-3}$ | 10.03 | $4.5 \times 10^{-4}$ | 1.10 | $6.9 \times 10^{-1}$ |
| Q92111 | Transferrin (Trf)                                                        | 3.85 | $2.8 \times 10^{-3}$ | 4.94  | $4.3 \times 10^{-3}$ | 0.93 | $8.3 \times 10^{-1}$ |
| Q00897 | Serine (or cysteine) peptidase inhibitor, clade A, member 1D (Serpina1d) | 3.79 | $4.1 \times 10^{-4}$ | 4.31  | $3.9 \times 10^{-4}$ | 0.92 | $6.0 \times 10^{-1}$ |

|        |                                                                          |      |                      |      |                      |      |                      |
|--------|--------------------------------------------------------------------------|------|----------------------|------|----------------------|------|----------------------|
| P01029 | Complement component 4B (Chido blood group) (C4b)                        | 3.69 | $3.1 \times 10^{-4}$ | 5.06 | $2.6 \times 10^{-4}$ | 0.72 | $1.1 \times 10^{-1}$ |
| Q8VCG4 | Complement component 8, gamma polypeptide (C8g)                          | 3.60 | $4.9 \times 10^{-4}$ | 3.95 | $3.8 \times 10^{-3}$ | 0.81 | $4.1 \times 10^{-1}$ |
| Q61703 | Inter-alpha trypsin inhibitor, heavy chain 2 (Itih2)                     | 3.58 | $4.0 \times 10^{-3}$ | 4.97 | $2.4 \times 10^{-3}$ | 0.98 | $9.6 \times 10^{-1}$ |
| P70665 | Sialic acid acetyltransferase (Siae)                                     | 3.57 | $9.7 \times 10^{-5}$ | 3.46 | $9.4 \times 10^{-3}$ | 0.79 | $2.6 \times 10^{-1}$ |
| E9PV24 | Fibrinogen alpha chain (Fga)                                             | 3.46 | $9.0 \times 10^{-3}$ | 3.49 | $8.9 \times 10^{-3}$ | 0.68 | $3.6 \times 10^{-1}$ |
| Q9DBB9 | Carboxypeptidase N, polypeptide 2 (Cpn2)                                 | 3.42 | $6.3 \times 10^{-3}$ | 3.93 | $6.6 \times 10^{-3}$ | 0.66 | $3.3 \times 10^{-1}$ |
| O08677 | Kininogen 1 (Kng1)                                                       | 3.38 | $3.3 \times 10^{-4}$ | 4.72 | $1.4 \times 10^{-3}$ | 0.83 | $2.9 \times 10^{-1}$ |
| Q8K0E8 | Fibrinogen beta chain (Fgb)                                              | 3.36 | $2.8 \times 10^{-3}$ | 3.45 | $2.2 \times 10^{-3}$ | 1.02 | $8.4 \times 10^{-1}$ |
| Q61129 | Complement component factor I (Cfi)                                      | 3.27 | $1.2 \times 10^{-3}$ | 4.54 | $2.5 \times 10^{-3}$ | 0.82 | $3.6 \times 10^{-1}$ |
| Q61247 | Serine (or cysteine) peptidase inhibitor, clade F, member 2 (Serpinf2)   | 3.07 | $1.3 \times 10^{-3}$ | 3.64 | $3.8 \times 10^{-3}$ | 0.89 | $5.0 \times 10^{-1}$ |
| P09041 | Phosphoglycerate kinase 2 (Pgk2)                                         | 3.04 | $3.7 \times 10^{-3}$ | 2.97 | $1.1 \times 10^{-2}$ | 1.48 | $5.9 \times 10^{-2}$ |
| P06909 | Complement component factor h (Cfh)                                      | 3.04 | $2.5 \times 10^{-3}$ | 4.46 | $1.3 \times 10^{-3}$ | 1.07 | $9.7 \times 10^{-1}$ |
| P46412 | Glutathione peroxidase 3 (Gpx3)                                          | 2.89 | $9.4 \times 10^{-4}$ | 3.55 | $1.2 \times 10^{-4}$ | 1.08 | $1.7 \times 10^{-1}$ |
| P13707 | Glycerol-3-phosphate dehydrogenase 1 (soluble) (Gpd1)                    | 2.87 | $2.4 \times 10^{-4}$ | 2.69 | $4.4 \times 10^{-4}$ | 0.96 | $6.7 \times 10^{-1}$ |
| P10107 | Annexin A1 (Anxa1)                                                       | 2.78 | $6.7 \times 10^{-4}$ | 2.50 | $6.4 \times 10^{-3}$ | 0.90 | $4.2 \times 10^{-1}$ |
| P97290 | Serine (or cysteine) peptidase inhibitor, clade G, member 1 (Serping1)   | 2.55 | $6.0 \times 10^{-3}$ | 3.72 | $2.6 \times 10^{-3}$ | 0.74 | $3.7 \times 10^{-1}$ |
| Q00623 | Apolipoprotein A-I (Apoa1)                                               | 2.41 | $2.6 \times 10^{-3}$ | 2.72 | $2.6 \times 10^{-3}$ | 0.72 | $1.7 \times 10^{-1}$ |
| Q06890 | Clusterin (Clu)                                                          | 2.23 | $1.3 \times 10^{-3}$ | 3.05 | $1.6 \times 10^{-3}$ | 0.84 | $1.8 \times 10^{-1}$ |
| P32848 | Parvalbumin (Pvalb)                                                      | 2.05 | $4.1 \times 10^{-3}$ | 2.60 | $3.1 \times 10^{-2}$ | 1.22 | $7.9 \times 10^{-2}$ |
| Q91WP6 | Serine (or cysteine) peptidase inhibitor, clade A, member 3N (Serpina3n) | 2.05 | $2.0 \times 10^{-3}$ | 1.76 | $2.3 \times 10^{-2}$ | 1.18 | $2.7 \times 10^{-2}$ |

|        |                                                                       |      |                      |      |                      |      |                      |
|--------|-----------------------------------------------------------------------|------|----------------------|------|----------------------|------|----------------------|
| P07901 | Heat shock protein 90, alpha (cytosolic), class A member 1 (Hsp90aa1) | 2.03 | $3.0 \times 10^{-3}$ | 2.56 | $1.4 \times 10^{-2}$ | 1.06 | $6.0 \times 10^{-1}$ |
| P04186 | Complement factor B (Cfb)                                             | 1.98 | $2.8 \times 10^{-3}$ | 2.22 | $2.8 \times 10^{-3}$ | 0.97 | $8.1 \times 10^{-1}$ |
| Q9ESB3 | Histidine-rich glycoprotein (Hrg)                                     | 1.95 | $7.6 \times 10^{-3}$ | 2.89 | $1.1 \times 10^{-2}$ | 1.02 | $8.2 \times 10^{-1}$ |
| Q9DBF1 | Aldehyde dehydrogenase family 7, member A1 (Aldh7a1)                  | 1.86 | $1.4 \times 10^{-4}$ | 1.63 | $1.4 \times 10^{-3}$ | 1.19 | $1.9 \times 10^{-1}$ |
| Q9JII6 | Aldo-keto reductase family 1, member A1 (aldehyde reductase) (Akr1a1) | 1.86 | $1.8 \times 10^{-4}$ | 1.96 | $1.7 \times 10^{-1}$ | 1.20 | $6.3 \times 10^{-1}$ |
| P19157 | Glutathione S-transferase, pi 1 (Gstp1)                               | 1.82 | $9.9 \times 10^{-4}$ | 2.50 | $1.4 \times 10^{-3}$ | 1.39 | $4.9 \times 10^{-2}$ |
| Q791V5 | Mitochondrial carrier 2 (Mtch2)                                       | 1.82 | $8.3 \times 10^{-3}$ | 1.68 | $1.1 \times 10^{-1}$ | 1.49 | $2.0 \times 10^{-2}$ |
| P05064 | Aldolase A, fructose-bisphosphate (Aldoa)                             | 1.78 | $1.5 \times 10^{-4}$ | 1.53 | $4.8 \times 10^{-3}$ | 0.96 | $5.1 \times 10^{-1}$ |
| P06745 | Glucose phosphate isomerase 1 (Gpi1)                                  | 1.76 | $2.8 \times 10^{-3}$ | 1.80 | $3.8 \times 10^{-3}$ | 1.09 | $3.5 \times 10^{-1}$ |
| P48758 | Carbonyl reductase 1 (Cbr1)                                           | 1.68 | $8.4 \times 10^{-4}$ | 1.73 | $4.3 \times 10^{-3}$ | 1.40 | $6.2 \times 10^{-3}$ |
| P13020 | Gelsolin (Gsn)                                                        | 1.66 | $2.3 \times 10^{-3}$ | 1.87 | $1.6 \times 10^{-3}$ | 0.96 | $7.2 \times 10^{-1}$ |
| Q9WUB3 | Muscle glycogen phosphorylase (Pygm)                                  | 1.64 | $2.9 \times 10^{-3}$ | 1.39 | $2.2 \times 10^{-2}$ | 0.89 | $1.3 \times 10^{-1}$ |
| P54818 | Galactosylceramidase (Galc)                                           | 1.62 | $8.5 \times 10^{-3}$ | 1.03 | $7.4 \times 10^{-1}$ | 1.12 | $1.0 \times 10^{-2}$ |
| P09411 | Phosphoglycerate kinase 1 (Pgk1)                                      | 1.62 | $8.8 \times 10^{-4}$ | 1.69 | $7.9 \times 10^{-3}$ | 1.18 | $5.8 \times 10^{-3}$ |
| P14602 | Heat shock protein 1 (Hspb1)                                          | 1.59 | $1.3 \times 10^{-3}$ | 1.80 | $2.7 \times 10^{-3}$ | 1.13 | $1.1 \times 10^{-1}$ |
| P17563 | Selenium binding protein 1 (Selenbp1)                                 | 1.57 | $4.1 \times 10^{-5}$ | 2.18 | $6.4 \times 10^{-4}$ | 1.47 | $2.4 \times 10^{-2}$ |
| P45376 | Aldo-keto reductase family 1, member B3 (aldose reductase) (Akr1b3)   | 1.56 | $7.4 \times 10^{-3}$ | 1.52 | $2.7 \times 10^{-2}$ | 1.10 | $4.2 \times 10^{-1}$ |
| P62983 | Ribosomal protein S27A (Rps27a)                                       | 1.55 | $4.5 \times 10^{-3}$ | 1.88 | $9.8 \times 10^{-4}$ | 1.01 | $8.5 \times 10^{-1}$ |
| P16858 | Glyceraldehyde-3-phosphate dehydrogenase (Gapdh)                      | 1.53 | $6.8 \times 10^{-3}$ | 1.53 | $3.7 \times 10^{-2}$ | 1.04 | $8.2 \times 10^{-1}$ |
| P09528 | Ferritin heavy polypeptide 1 (Fth1)                                   | 1.51 | $2.3 \times 10^{-3}$ | 1.95 | $7.8 \times 10^{-4}$ | 1.25 | $4.5 \times 10^{-1}$ |
| Q8R1G2 | Carboxymethylenebutenolidase-like (Pseudomonas) (Cmb1)                | 1.48 | $7.0 \times 10^{-3}$ | 1.28 | $1.0 \times 10^{-2}$ | 1.07 | $4.9 \times 10^{-1}$ |

|        |                                                                          |      |                      |      |                      |      |                      |
|--------|--------------------------------------------------------------------------|------|----------------------|------|----------------------|------|----------------------|
| P24549 | Aldehyde dehydrogenase family 1, subfamily A1 (Aldh1a1)                  | 1.47 | $8.0 \times 10^{-4}$ | 1.43 | $4.3 \times 10^{-3}$ | 0.93 | $2.7 \times 10^{-1}$ |
| P52480 | Pyruvate kinase, muscle (Pkm)                                            | 1.46 | $2.5 \times 10^{-3}$ | 1.37 | $1.4 \times 10^{-2}$ | 1.05 | $4.2 \times 10^{-1}$ |
| Q64105 | Sepiapterin reductase (Spr)                                              | 1.45 | $5.2 \times 10^{-3}$ | 1.44 | $1.4 \times 10^{-3}$ | 1.18 | $1.8 \times 10^{-1}$ |
| P47791 | Glutathione reductase (Gsr)                                              | 1.43 | $4.1 \times 10^{-3}$ | 1.38 | $5.7 \times 10^{-3}$ | 1.04 | $8.9 \times 10^{-1}$ |
| P51885 | Lumican (Lum)                                                            | 1.41 | $1.3 \times 10^{-3}$ | 1.51 | $3.9 \times 10^{-3}$ | 1.05 | $6.5 \times 10^{-1}$ |
| P45377 | Aldo-keto reductase family 1, member B8 (Akr1b8)                         | 1.35 | $1.4 \times 10^{-3}$ | 1.42 | $3.2 \times 10^{-2}$ | 1.11 | $3.0 \times 10^{-1}$ |
| Q99JB8 | Protein kinase C and casein kinase substrate in neurons 3 (Pacsin3)      | 1.34 | $1.1 \times 10^{-4}$ | 1.46 | $1.1 \times 10^{-4}$ | 1.07 | $1.1 \times 10^{-1}$ |
| Q9R0Y5 | Adenylate kinase 1 (Ak1)                                                 | 1.29 | $1.4 \times 10^{-3}$ | 1.31 | $8.7 \times 10^{-3}$ | 0.98 | $6.7 \times 10^{-1}$ |
| Q60854 | Serine (or cysteine) peptidase inhibitor, clade B, member 6a (Serpina6a) | 1.28 | $7.7 \times 10^{-3}$ | 1.35 | $3.3 \times 10^{-4}$ | 0.98 | $4.3 \times 10^{-1}$ |
| Q9Z130 | Heterogeneous nuclear ribonucleoprotein D-like (Hnrnpdl)                 | 1.28 | $9.3 \times 10^{-3}$ | 1.31 | $1.6 \times 10^{-1}$ | 1.03 | $9.0 \times 10^{-1}$ |
| P06151 | Lactate dehydrogenase A (Ldha)                                           | 1.28 | $4.4 \times 10^{-3}$ | 1.12 | $7.6 \times 10^{-2}$ | 0.90 | $8.6 \times 10^{-2}$ |
| Q8CDN6 | Thioredoxin-like 1 (Txnl1)                                               | 1.22 | $8.3 \times 10^{-3}$ | 1.11 | $1.4 \times 10^{-2}$ | 1.11 | $9.8 \times 10^{-3}$ |
| P47857 | Phosphofructokinase, muscle (Pfkfb3)                                     | 1.21 | $3.8 \times 10^{-3}$ | 1.02 | $6.8 \times 10^{-1}$ | 0.90 | $6.4 \times 10^{-2}$ |
| P62908 | Ribosomal protein S3 (Rps3)                                              | 1.14 | $2.3 \times 10^{-3}$ | 0.88 | $3.4 \times 10^{-1}$ | 0.90 | $8.7 \times 10^{-2}$ |
| Q3ULJ0 | Glycerol-3-phosphate dehydrogenase 1-like (Gpd1l)                        | 1.14 | $2.8 \times 10^{-3}$ | 1.19 | $1.4 \times 10^{-4}$ | 1.00 | $9.9 \times 10^{-1}$ |
| P24527 | Leukotriene A4 hydrolase (Lta4h)                                         | 1.14 | $8.3 \times 10^{-4}$ | 1.24 | $9.7 \times 10^{-4}$ | 0.97 | $4.2 \times 10^{-1}$ |
| P63028 | Tumor protein, translationally-controlled 1 (Tpt1)                       | 1.14 | $1.0 \times 10^{-3}$ | 1.29 | $4.4 \times 10^{-3}$ | 1.04 | $5.5 \times 10^{-1}$ |
| Q91Z53 | Glyoxylate reductase/hydroxypyruvate reductase (Grhpr)                   | 1.13 | $9.2 \times 10^{-3}$ | 1.18 | $7.4 \times 10^{-3}$ | 0.98 | $6.4 \times 10^{-1}$ |
| Q9QYG0 | N-myc downstream regulated gene 2 (Ndr2)                                 | 1.12 | $3.9 \times 10^{-3}$ | 1.17 | $4.9 \times 10^{-3}$ | 1.03 | $4.8 \times 10^{-1}$ |
| P28474 | Alcohol dehydrogenase 5 (class III), chi polypeptide (Adh5)              | 1.08 | $2.5 \times 10^{-3}$ | 1.15 | $1.3 \times 10^{-2}$ | 0.99 | $7.9 \times 10^{-1}$ |
| P01868 | Immunoglobulin heavy constant gamma 1 (G1m marker) (Ighg1)               | 5.87 | $1.7 \times 10^{-2}$ | 6.29 | $6.1 \times 10^{-4}$ | 2.33 | $1.7 \times 10^{-1}$ |



|        |                                                                                       |      |                      |      |                      |      |                      |
|--------|---------------------------------------------------------------------------------------|------|----------------------|------|----------------------|------|----------------------|
| Q8VCM7 | Fibrinogen gamma chain (Fgg)                                                          | 3.81 | $1.1 \times 10^{-2}$ | 4.08 | $8.6 \times 10^{-3}$ | 0.80 | $6.3 \times 10^{-1}$ |
| Q80YC5 | Coagulation factor XII (Hageman factor) (F12)                                         | 2.09 | $1.1 \times 10^{-2}$ | 3.67 | $6.8 \times 10^{-4}$ | 0.79 | $3.0 \times 10^{-1}$ |
| P70695 | Fructose biphosphatase 2 (Fbp2)                                                       | 2.46 | $1.5 \times 10^{-2}$ | 2.71 | $2.4 \times 10^{-3}$ | 1.16 | $3.4 \times 10^{-1}$ |
| P32261 | Serine (or cysteine) peptidase inhibitor, clade C (antithrombin), member 1 (Serpinc1) | 2.49 | $1.1 \times 10^{-2}$ | 2.46 | $5.1 \times 10^{-3}$ | 0.77 | $2.9 \times 10^{-1}$ |
| Q9DAK9 | Phosphohistidine phosphatase 1 (Phpt1)                                                | 1.49 | $1.1 \times 10^{-2}$ | 1.77 | $1.5 \times 10^{-3}$ | 1.17 | $9.5 \times 10^{-2}$ |
| Q9CRB6 | Tubulin polymerization-promoting protein family member 3 (Tppp3)                      | 1.53 | $9.4 \times 10^{-2}$ | 1.76 | $8.4 \times 10^{-3}$ | 1.55 | $1.4 \times 10^{-2}$ |
| O88668 | Cellular repressor of E1A-stimulated genes 1 (Creg1)                                  | 1.44 | $2.9 \times 10^{-2}$ | 1.73 | $6.3 \times 10^{-3}$ | 1.42 | $7.6 \times 10^{-2}$ |
| P11352 | Glutathione peroxidase 1 (Gpx1)                                                       | 1.26 | $5.0 \times 10^{-2}$ | 1.55 | $6.1 \times 10^{-3}$ | 1.03 | $6.4 \times 10^{-1}$ |
| Q60847 | Collagen, type XII, alpha 1 (Col12a1)                                                 | 1.36 | $1.5 \times 10^{-2}$ | 1.53 | $1.1 \times 10^{-3}$ | 1.20 | $1.5 \times 10^{-1}$ |
| P48774 | Glutathione S-transferase, mu 5 (Gstm5)                                               | 1.20 | $1.4 \times 10^{-2}$ | 1.48 | $6.2 \times 10^{-4}$ | 0.99 | $8.1 \times 10^{-1}$ |
| P53994 | RAB2A, member RAS oncogene family (Rab2a)                                             | 1.20 | $3.6 \times 10^{-2}$ | 1.41 | $1.0 \times 10^{-3}$ | 1.03 | $6.9 \times 10^{-1}$ |
| O88844 | Isocitrate dehydrogenase 1 (NADP+), soluble (Idh1)                                    | 0.94 | $4.6 \times 10^{-1}$ | 1.41 | $1.7 \times 10^{-3}$ | 1.00 | $9.2 \times 10^{-1}$ |
| P40142 | Transketolase (Tkt)                                                                   | 1.24 | $5.9 \times 10^{-2}$ | 1.41 | $2.4 \times 10^{-3}$ | 1.09 | $5.2 \times 10^{-1}$ |
| P47199 | Crystallin, zeta (Cryz)                                                               | 1.20 | $1.0 \times 10^{-2}$ | 1.35 | $6.2 \times 10^{-4}$ | 1.02 | $8.4 \times 10^{-1}$ |
| Q9JHW2 | Nitrilase family, member 2 (Nit2)                                                     | 1.05 | $6.6 \times 10^{-1}$ | 1.34 | $5.4 \times 10^{-4}$ | 1.05 | $1.7 \times 10^{-1}$ |
| Q9JK53 | Proline arginine-rich end leucine-rich repeat (Prelp)                                 | 1.07 | $2.9 \times 10^{-1}$ | 1.33 | $5.7 \times 10^{-3}$ | 1.06 | $3.1 \times 10^{-1}$ |
| Q8BVI4 | Quinoid dihydropteridine reductase (Qdpr)                                             | 1.26 | $4.8 \times 10^{-2}$ | 1.32 | $3.6 \times 10^{-3}$ | 1.05 | $6.8 \times 10^{-1}$ |
| Q99LX0 | Parkinson disease (autosomal recessive, early onset) 7 (Park7)                        | 1.26 | $2.1 \times 10^{-2}$ | 1.31 | $7.4 \times 10^{-3}$ | 0.99 | $7.7 \times 10^{-1}$ |
| P16045 | Lectin, galactose binding, soluble 1 (Lgals1)                                         | 1.15 | $1.8 \times 10^{-2}$ | 1.29 | $4.2 \times 10^{-4}$ | 1.02 | $7.5 \times 10^{-1}$ |

|        |                                                                                    |      |                      |      |                      |      |                      |
|--------|------------------------------------------------------------------------------------|------|----------------------|------|----------------------|------|----------------------|
| P63005 | Platelet-activating factor acetylhydrolase, isoform 1b, subunit 1 (Pafah1b1)       | 1.16 | $1.8 \times 10^{-2}$ | 1.29 | $3.7 \times 10^{-3}$ | 1.15 | $5.4 \times 10^{-2}$ |
| P97384 | Annexin A11 (Anxa11)                                                               | 1.13 | $3.9 \times 10^{-2}$ | 1.26 | $2.7 \times 10^{-3}$ | 1.04 | $3.1 \times 10^{-1}$ |
| P09405 | Nucleolin (Ncl)                                                                    | 1.02 | $6.4 \times 10^{-1}$ | 1.25 | $9.2 \times 10^{-4}$ | 1.07 | $5.9 \times 10^{-1}$ |
| Q99PT1 | Rho GDP dissociation inhibitor (GDI) alpha (Arhgdia)                               | 1.07 | $3.0 \times 10^{-2}$ | 1.17 | $4.2 \times 10^{-3}$ | 1.08 | $7.0 \times 10^{-2}$ |
| Q02053 | Ubiquitin-like modifier activating enzyme 1 (Uba1)                                 | 1.06 | $7.0 \times 10^{-2}$ | 1.16 | $1.2 \times 10^{-3}$ | 1.02 | $5.6 \times 10^{-1}$ |
| Q9CQ60 | 6-phosphogluconolactonase (Pgls)                                                   | 0.92 | $4.2 \times 10^{-1}$ | 1.12 | $5.4 \times 10^{-3}$ | 1.01 | $8.3 \times 10^{-1}$ |
| P62071 | Related RAS viral (r-ras) oncogene 2 (Rras2)                                       | 1.03 | $7.8 \times 10^{-1}$ | 1.35 | $9.1 \times 10^{-1}$ | 1.74 | $4.5 \times 10^{-4}$ |
| O35215 | D-dopachrome tautomerase (Ddt)                                                     | 1.03 | $9.4 \times 10^{-1}$ | 1.46 | $7.4 \times 10^{-2}$ | 1.67 | $7.3 \times 10^{-3}$ |
| P70349 | Histidine triad nucleotide binding protein 1 (Hint1)                               | 1.43 | $1.5 \times 10^{-2}$ | 1.95 | $1.2 \times 10^{-1}$ | 1.45 | $5.3 \times 10^{-3}$ |
| Q8K183 | Pyridoxal (pyridoxine, vitamin B6) kinase (Pdxk)                                   | 1.28 | $3.3 \times 10^{-2}$ | 1.13 | $2.0 \times 10^{-1}$ | 1.41 | $4.8 \times 10^{-3}$ |
| O09131 | Glutathione S-transferase omega 1 (Gsto1)                                          | 0.87 | $1.4 \times 10^{-1}$ | 0.97 | $6.3 \times 10^{-1}$ | 1.26 | $6.3 \times 10^{-3}$ |
| P62814 | ATPase, H <sup>+</sup> transporting, lysosomal V1 subunit B2 (Atp6v1b2)            | 1.03 | $4.0 \times 10^{-1}$ | 1.10 | $3.9 \times 10^{-2}$ | 1.18 | $6.1 \times 10^{-3}$ |
| Q6PIE5 | ATPase, Na <sup>+</sup> /K <sup>+</sup> transporting, alpha 2 polypeptide (Atp1a2) | 1.15 | $5.0 \times 10^{-2}$ | 1.11 | $3.9 \times 10^{-2}$ | 1.18 | $5.4 \times 10^{-3}$ |
| Q9QUI0 | Ras homolog family member A (Rhoa)                                                 | 0.94 | $2.0 \times 10^{-1}$ | 1.05 | $4.7 \times 10^{-1}$ | 1.09 | $6.0 \times 10^{-3}$ |
| P97355 | Spermine synthase (Sms)                                                            | 0.13 | $4.7 \times 10^{-3}$ | 2.09 | $9.4 \times 10^{-1}$ | 0.52 | $2.1 \times 10^{-1}$ |
| O88746 | Target of myb1 trafficking protein (Tom1)                                          | 0.35 | $4.2 \times 10^{-4}$ | 0.43 | $5.3 \times 10^{-4}$ | 1.05 | $5.8 \times 10^{-1}$ |
| O35459 | Enoyl coenzyme A hydratase 1, peroxisomal (Ech1)                                   | 0.38 | $6.1 \times 10^{-4}$ | 0.46 | $1.1 \times 10^{-3}$ | 0.92 | $3.7 \times 10^{-1}$ |
| Q9R0Q7 | Prostaglandin E synthase 3 (cytosolic) (Ptges3)                                    | 0.40 | $5.1 \times 10^{-3}$ | 0.25 | $3.1 \times 10^{-2}$ | 1.15 | $5.4 \times 10^{-1}$ |
| Q8CI43 | Myosin, light polypeptide 6B (Myl6b)                                               | 0.43 | $6.3 \times 10^{-3}$ | 0.47 | $3.6 \times 10^{-3}$ | 1.44 | $9.7 \times 10^{-2}$ |

|        |                                                                                    |      |                      |      |                      |      |                      |
|--------|------------------------------------------------------------------------------------|------|----------------------|------|----------------------|------|----------------------|
| Q9CYH2 | Family with sequence similarity 213, member A (Fam213a)                            | 0.46 | $3.0 \times 10^{-4}$ | 0.73 | $4.1 \times 10^{-2}$ | 1.09 | $5.0 \times 10^{-1}$ |
| P34914 | Epoxide hydrolase 2, cytoplasmic (Ephx2)                                           | 0.48 | $5.4 \times 10^{-4}$ | 0.60 | $9.9 \times 10^{-4}$ | 1.08 | $3.0 \times 10^{-1}$ |
| P23927 | Crystallin, alpha B (Cryab)                                                        | 0.48 | $1.1 \times 10^{-3}$ | 0.54 | $1.7 \times 10^{-5}$ | 1.10 | $8.7 \times 10^{-2}$ |
| P24270 | Catalase (Cat)                                                                     | 0.49 | $3.5 \times 10^{-3}$ | 0.62 | $1.0 \times 10^{-2}$ | 1.12 | $5.6 \times 10^{-1}$ |
| Q8VDN2 | ATPase, Na <sup>+</sup> /K <sup>+</sup> transporting, alpha 1 polypeptide (Atp1a1) | 0.49 | $6.7 \times 10^{-3}$ | 0.55 | $1.6 \times 10^{-2}$ | 1.13 | $2.3 \times 10^{-1}$ |
| P31001 | Desmin (Des)                                                                       | 0.52 | $2.6 \times 10^{-4}$ | 0.51 | $2.6 \times 10^{-4}$ | 1.07 | $2.9 \times 10^{-1}$ |
| Q04447 | Creatine kinase, brain (Ckb)                                                       | 0.52 | $5.5 \times 10^{-3}$ | 1.06 | $8.3 \times 10^{-1}$ | 1.34 | $2.6 \times 10^{-4}$ |
| P45952 | Acyl-Coenzyme A dehydrogenase, medium chain (Acadm)                                | 0.53 | $1.5 \times 10^{-3}$ | 0.61 | $2.8 \times 10^{-4}$ | 0.94 | $2.3 \times 10^{-1}$ |
| P99024 | Tubulin, beta 5 class I (Tubb5)                                                    | 0.53 | $2.2 \times 10^{-5}$ | 0.59 | $1.5 \times 10^{-2}$ | 0.98 | $7.8 \times 10^{-1}$ |
| Q99LB2 | Dehydrogenase/reductase (SDR family) member 4 (Dhrs4)                              | 0.55 | $1.6 \times 10^{-3}$ | 0.69 | $1.4 \times 10^{-2}$ | 0.85 | $7.1 \times 10^{-2}$ |
| P54071 | Isocitrate dehydrogenase 2 (NADP <sup>+</sup> ), mitochondrial (Idh2)              | 0.57 | $4.4 \times 10^{-4}$ | 0.70 | $3.9 \times 10^{-3}$ | 1.04 | $6.6 \times 10^{-1}$ |
| P11404 | Fatty acid binding protein 3, muscle and heart (Fabp3)                             | 0.57 | $9.4 \times 10^{-3}$ | 0.77 | $2.1 \times 10^{-2}$ | 1.03 | $8.4 \times 10^{-1}$ |
| P62082 | Ribosomal protein S7 (Rps7)                                                        | 0.58 | $7.4 \times 10^{-3}$ | 0.77 | $2.3 \times 10^{-1}$ | 0.99 | $9.1 \times 10^{-1}$ |
| P26041 | Moesin (Msn)                                                                       | 0.58 | $7.2 \times 10^{-3}$ | 0.76 | $9.4 \times 10^{-2}$ | 0.95 | $3.4 \times 10^{-1}$ |
| P20152 | Vimentin (Vim)                                                                     | 0.59 | $3.0 \times 10^{-3}$ | 0.65 | $2.0 \times 10^{-3}$ | 0.90 | $4.8 \times 10^{-1}$ |
| Q99KK7 | Dipeptidylpeptidase 3 (Dpp3)                                                       | 0.60 | $2.1 \times 10^{-3}$ | 0.75 | $1.2 \times 10^{-2}$ | 1.01 | $9.3 \times 10^{-1}$ |
| P62830 | Ribosomal protein L23 (Rpl23)                                                      | 0.61 | $1.0 \times 10^{-4}$ | 0.74 | $1.8 \times 10^{-1}$ | 1.05 | $4.4 \times 10^{-1}$ |
| Q9D8W5 | Proteasome (prosome, macropain) 26S subunit, non-ATPase, 12 (Psm12)                | 0.61 | $9.5 \times 10^{-3}$ | 0.89 | $4.8 \times 10^{-1}$ | 0.84 | $3.7 \times 10^{-1}$ |
| P15532 | NME/NM23 nucleoside diphosphate kinase 1 (Nme1)                                    | 0.62 | $8.3 \times 10^{-3}$ | 0.84 | $2.5 \times 10^{-1}$ | 0.87 | $4.1 \times 10^{-1}$ |
| P62196 | Protease (prosome, macropain) 26S subunit, ATPase 5 (Psmc5)                        | 0.62 | $1.6 \times 10^{-3}$ | 0.78 | $2.6 \times 10^{-1}$ | 0.92 | $5.5 \times 10^{-1}$ |
| Q9EQH3 | VPS35 retromer complex component (Vps35)                                           | 0.62 | $6.2 \times 10^{-3}$ | 0.72 | $4.4 \times 10^{-2}$ | 1.01 | $9.6 \times 10^{-1}$ |

|        |                                                                                                                                              |      |                      |      |                      |      |                      |
|--------|----------------------------------------------------------------------------------------------------------------------------------------------|------|----------------------|------|----------------------|------|----------------------|
| Q8BWT1 | Acetyl-Coenzyme A acyltransferase 2 (mitochondrial 3-oxoacyl-Coenzyme A thiolase) (Acaa2)                                                    | 0.63 | $1.8 \times 10^{-3}$ | 0.71 | $1.0 \times 10^{-3}$ | 0.95 | $2.7 \times 10^{-1}$ |
| P42125 | Enoyl-Coenzyme A delta isomerase 1 (Eci1)                                                                                                    | 0.64 | $1.8 \times 10^{-3}$ | 0.72 | $1.1 \times 10^{-3}$ | 0.93 | $3.4 \times 10^{-1}$ |
| Q6GSS7 | Histone cluster 2, H2aa1 (Hist2h2aa1)                                                                                                        | 0.65 | $3.1 \times 10^{-3}$ | 0.93 | $5.5 \times 10^{-1}$ | 1.03 | $6.9 \times 10^{-1}$ |
| Q9QYR9 | Acyl-CoA thioesterase 2 (Acot2)                                                                                                              | 0.65 | $1.4 \times 10^{-3}$ | 0.75 | $6.2 \times 10^{-3}$ | 0.98 | $8.2 \times 10^{-1}$ |
| Q99JY0 | Hydroxyacyl-Coenzyme A dehydrogenase/3-ketoacyl-Coenzyme A thiolase/enoyl-Coenzyme A hydratase (trifunctional protein), beta subunit (Hadhb) | 0.65 | $9.9 \times 10^{-5}$ | 0.78 | $1.3 \times 10^{-2}$ | 0.95 | $4.5 \times 10^{-1}$ |
| Q91ZJ5 | UDP-glucose pyrophosphorylase 2 (Ugp2)                                                                                                       | 0.66 | $6.0 \times 10^{-4}$ | 0.69 | $2.6 \times 10^{-3}$ | 0.95 | $2.0 \times 10^{-1}$ |
| P50518 | ATPase, H <sup>+</sup> transporting, lysosomal V1 subunit E1 (Atp6v1e1)                                                                      | 0.67 | $3.2 \times 10^{-3}$ | 0.86 | $9.5 \times 10^{-2}$ | 1.09 | $3.0 \times 10^{-1}$ |
| Q9CQ62 | 2,4-dienoyl CoA reductase 1, mitochondrial (Decr1)                                                                                           | 0.68 | $1.3 \times 10^{-3}$ | 0.77 | $6.0 \times 10^{-3}$ | 0.98 | $7.3 \times 10^{-1}$ |
| P21107 | Tropomyosin 3, gamma (Tpm3)                                                                                                                  | 0.68 | $8.8 \times 10^{-3}$ | 0.71 | $1.7 \times 10^{-2}$ | 1.14 | $2.1 \times 10^{-1}$ |
| Q6ZWY9 | Histone cluster 1, H2bc (Hist1h2bc)                                                                                                          | 0.68 | $9.6 \times 10^{-3}$ | 0.97 | $7.5 \times 10^{-1}$ | 1.01 | $9.3 \times 10^{-1}$ |
| Q8QZT1 | Acetyl-Coenzyme A acetyltransferase 1 (Acat1)                                                                                                | 0.68 | $2.9 \times 10^{-4}$ | 0.75 | $2.2 \times 10^{-3}$ | 0.93 | $8.3 \times 10^{-2}$ |
| P00405 | Cytochrome c oxidase subunit II (COX2)                                                                                                       | 0.69 | $6.9 \times 10^{-3}$ | 0.78 | $3.0 \times 10^{-2}$ | 0.84 | $1.0 \times 10^{-1}$ |
| P18242 | Cathepsin D (Ctsd)                                                                                                                           | 0.70 | $4.9 \times 10^{-3}$ | 0.96 | $5.8 \times 10^{-1}$ | 0.99 | $8.7 \times 10^{-1}$ |
| Q9JM76 | Actin related protein 2/3 complex, subunit 3 (Arpc3)                                                                                         | 0.70 | $2.9 \times 10^{-3}$ | 0.82 | $2.0 \times 10^{-3}$ | 1.03 | $6.4 \times 10^{-1}$ |
| Q9DBL1 | Acyl-Coenzyme A dehydrogenase, short/branched chain (Acadsb)                                                                                 | 0.70 | $5.9 \times 10^{-3}$ | 0.83 | $6.4 \times 10^{-2}$ | 0.90 | $2.8 \times 10^{-1}$ |
| P60867 | Ribosomal protein S20 (Rps20)                                                                                                                | 0.71 | $2.7 \times 10^{-3}$ | 0.84 | $1.7 \times 10^{-2}$ | 0.87 | $3.8 \times 10^{-2}$ |
| Q99LC5 | Electron transferring flavoprotein, alpha polypeptide (EtfA)                                                                                 | 0.72 | $3.0 \times 10^{-3}$ | 0.88 | $5.1 \times 10^{-2}$ | 0.95 | $3.3 \times 10^{-1}$ |
| Q9CQN1 | TNF receptor-associated protein 1 (Trap1)                                                                                                    | 0.72 | $9.8 \times 10^{-3}$ | 0.90 | $4.2 \times 10^{-1}$ | 0.96 | $5.8 \times 10^{-1}$ |

|        |                                                                                         |      |                      |      |                      |      |                      |
|--------|-----------------------------------------------------------------------------------------|------|----------------------|------|----------------------|------|----------------------|
| Q99KQ4 | Nicotinamide phosphoribosyltransferase (Nampt)                                          | 0.72 | $2.9 \times 10^{-3}$ | 0.79 | $1.1 \times 10^{-2}$ | 0.96 | $6.4 \times 10^{-1}$ |
| P68037 | Ubiquitin-conjugating enzyme E2L3 (Ube2l3)                                              | 0.73 | $7.1 \times 10^{-3}$ | 0.86 | $2.0 \times 10^{-1}$ | 0.96 | $6.3 \times 10^{-1}$ |
| Q62425 | NADH dehydrogenase (ubiquinone) 1 alpha subcomplex, 4 (Ndufa4)                          | 0.73 | $7.4 \times 10^{-3}$ | 0.82 | $5.7 \times 10^{-2}$ | 0.94 | $4.4 \times 10^{-1}$ |
| Q8QZS1 | 3-hydroxyisobutyryl-Coenzyme A hydrolase (Hibch)                                        | 0.74 | $2.2 \times 10^{-3}$ | 0.87 | $2.2 \times 10^{-2}$ | 0.94 | $5.4 \times 10^{-2}$ |
| P27773 | Protein disulfide isomerase associated 3 (Pdia3)                                        | 0.74 | $5.5 \times 10^{-3}$ | 0.75 | $1.7 \times 10^{-3}$ | 0.87 | $5.7 \times 10^{-2}$ |
| P38647 | Heat shock protein 9 (Hspa9)                                                            | 0.74 | $2.7 \times 10^{-3}$ | 0.76 | $5.6 \times 10^{-3}$ | 0.95 | $4.3 \times 10^{-1}$ |
| P16125 | Lactate dehydrogenase B (Ldhb)                                                          | 0.74 | $6.7 \times 10^{-3}$ | 0.82 | $3.3 \times 10^{-3}$ | 1.05 | $5.1 \times 10^{-1}$ |
| Q9D2G2 | Dihydrolipoamide S-succinyltransferase (E2 component of 2-oxo-glutarate complex) (Dlst) | 0.75 | $3.8 \times 10^{-3}$ | 0.81 | $7.4 \times 10^{-3}$ | 0.90 | $8.6 \times 10^{-2}$ |
| Q8VDQ1 | Prostaglandin reductase 2 (Ptgr2)                                                       | 0.75 | $7.9 \times 10^{-3}$ | 0.84 | $1.9 \times 10^{-1}$ | 1.13 | $1.3 \times 10^{-1}$ |
| Q9EQP2 | EH-domain containing 4 (Ehd4)                                                           | 0.75 | $2.1 \times 10^{-3}$ | 0.89 | $1.5 \times 10^{-1}$ | 0.99 | $8.5 \times 10^{-1}$ |
| Q99M71 | Ependymin related protein 1 (zebrafish) (Epdr1)                                         | 0.75 | $5.1 \times 10^{-3}$ | 0.75 | $3.5 \times 10^{-3}$ | 1.12 | $6.1 \times 10^{-1}$ |
| Q9CQM5 | Thioredoxin domain containing 17 (Txndc17)                                              | 0.76 | $6.4 \times 10^{-3}$ | 1.21 | $2.9 \times 10^{-1}$ | 0.94 | $6.3 \times 10^{-1}$ |
| Q9CPY7 | Leucine aminopeptidase 3 (Lap3)                                                         | 0.76 | $3.9 \times 10^{-3}$ | 0.84 | $3.2 \times 10^{-2}$ | 1.03 | $7.4 \times 10^{-1}$ |
| Q64010 | V-crk avian sarcoma virus CT10 oncogene homolog (Crk)                                   | 0.76 | $9.0 \times 10^{-3}$ | 0.87 | $2.3 \times 10^{-1}$ | 0.87 | $7.4 \times 10^{-2}$ |
| P26516 | Proteasome (prosome, macropain) 26S subunit, non-ATPase, 7 (Psm7)                       | 0.76 | $6.9 \times 10^{-3}$ | 0.76 | $1.2 \times 10^{-2}$ | 1.04 | $7.7 \times 10^{-1}$ |
| Q8VEM8 | Solute carrier family 25 (mitochondrial carrier, phosphate carrier), member 3 (Slc25a3) | 0.76 | $8.0 \times 10^{-3}$ | 0.83 | $1.4 \times 10^{-2}$ | 0.99 | $9.1 \times 10^{-1}$ |
| P12787 | Cytochrome c oxidase subunit Va (Cox5a)                                                 | 0.76 | $7.7 \times 10^{-3}$ | 0.87 | $1.6 \times 10^{-1}$ | 1.03 | $7.8 \times 10^{-1}$ |
| P08113 | Heat shock protein 90, beta (Grp94), member 1 (Hsp90b1)                                 | 0.77 | $7.1 \times 10^{-3}$ | 0.78 | $1.1 \times 10^{-1}$ | 1.03 | $7.1 \times 10^{-1}$ |

|        |                                                                                                    |      |                      |      |                      |      |                      |
|--------|----------------------------------------------------------------------------------------------------|------|----------------------|------|----------------------|------|----------------------|
| Q9DCX2 | ATP synthase, H <sup>+</sup> transporting, mitochondrial F <sub>0</sub> complex, subunit D (Atp5h) | 0.77 | $6.9 \times 10^{-3}$ | 0.87 | $1.7 \times 10^{-2}$ | 0.96 | $4.9 \times 10^{-1}$ |
| Q9DCM2 | Glutathione S-transferase kappa 1 (Gstk1)                                                          | 0.77 | $1.5 \times 10^{-4}$ | 1.02 | $8.0 \times 10^{-1}$ | 0.99 | $8.3 \times 10^{-1}$ |
| P19783 | Cytochrome c oxidase subunit IV isoform 1 (Cox4i1)                                                 | 0.78 | $1.6 \times 10^{-3}$ | 0.80 | $4.0 \times 10^{-3}$ | 0.91 | $1.4 \times 10^{-1}$ |
| P62821 | RAB1A, member RAS oncogene family (Rab1a)                                                          | 0.78 | $3.3 \times 10^{-3}$ | 0.70 | $4.5 \times 10^{-2}$ | 1.05 | $6.4 \times 10^{-1}$ |
| P48771 | Cytochrome c oxidase subunit VIIa 2 (Cox7a2)                                                       | 0.79 | $2.4 \times 10^{-3}$ | 0.84 | $8.1 \times 10^{-2}$ | 0.92 | $2.9 \times 10^{-1}$ |
| Q9CZU6 | Citrate synthase (Cs)                                                                              | 0.79 | $6.5 \times 10^{-4}$ | 0.87 | $2.7 \times 10^{-3}$ | 0.93 | $5.4 \times 10^{-2}$ |
| Q9QXS1 | Plectin (Plec)                                                                                     | 0.80 | $2.3 \times 10^{-3}$ | 0.81 | $2.0 \times 10^{-3}$ | 1.03 | $1.6 \times 10^{-1}$ |
| P97807 | Fumarate hydratase 1 (Fh1)                                                                         | 0.81 | $5.9 \times 10^{-3}$ | 1.00 | 1.0                  | 0.88 | $4.8 \times 10^{-2}$ |
| Q9CQM9 | Glutaredoxin 3 (Glr3)                                                                              | 0.82 | $2.6 \times 10^{-3}$ | 0.94 | $2.5 \times 10^{-1}$ | 0.91 | $2.1 \times 10^{-1}$ |
| Q9D051 | Pyruvate dehydrogenase (lipoamide) beta (Pdhb)                                                     | 0.82 | $5.2 \times 10^{-3}$ | 0.91 | $5.5 \times 10^{-2}$ | 0.92 | $2.3 \times 10^{-1}$ |
| Q9JI91 | Actinin alpha 2 (Actn2)                                                                            | 0.82 | $1.1 \times 10^{-3}$ | 0.88 | $9.6 \times 10^{-4}$ | 1.09 | $7.5 \times 10^{-2}$ |
| P08249 | Malate dehydrogenase 2, NAD (mitochondrial) (Mdh2)                                                 | 0.82 | $4.1 \times 10^{-3}$ | 0.91 | $1.6 \times 10^{-1}$ | 0.91 | $6.4 \times 10^{-2}$ |
| Q8R164 | Biphenyl hydrolase-like (serine hydrolase, breast epithelial mucin-associated antigen) (Bphl)      | 0.83 | $8.8 \times 10^{-3}$ | 0.92 | $1.3 \times 10^{-1}$ | 0.93 | $6.1 \times 10^{-2}$ |
| Q9DB77 | Ubiquinol cytochrome c reductase core protein 2 (Uqcrc2)                                           | 0.83 | $2.5 \times 10^{-4}$ | 0.91 | $1.7 \times 10^{-1}$ | 0.89 | $8.6 \times 10^{-2}$ |
| P32921 | Tryptophanyl-tRNA synthetase (Wars)                                                                | 0.84 | $5.9 \times 10^{-3}$ | 0.94 | $1.9 \times 10^{-1}$ | 1.00 | $9.7 \times 10^{-1}$ |
| P61027 | RAB10, member RAS oncogene family (Rab10)                                                          | 0.85 | $8.1 \times 10^{-3}$ | 0.84 | $1.3 \times 10^{-1}$ | 0.95 | $3.8 \times 10^{-1}$ |
| P47738 | Aldehyde dehydrogenase 2, mitochondrial (Aldh2)                                                    | 0.85 | $9.5 \times 10^{-3}$ | 0.95 | $1.8 \times 10^{-1}$ | 0.98 | $7.0 \times 10^{-1}$ |
| Q9D6Y9 | Glucan (1,4-alpha-), branching enzyme 1 (Gbe1)                                                     | 0.86 | $5.6 \times 10^{-3}$ | 0.97 | $6.2 \times 10^{-1}$ | 1.03 | $4.8 \times 10^{-1}$ |

|        |                                                                        |      |                      |      |                      |      |                      |
|--------|------------------------------------------------------------------------|------|----------------------|------|----------------------|------|----------------------|
| P05202 | Glutamic-oxaloacetic transaminase 2, mitochondrial (Got2)              | 0.86 | $1.6 \times 10^{-3}$ | 0.94 | $2.6 \times 10^{-1}$ | 0.96 | $3.8 \times 10^{-1}$ |
| P62141 | Protein phosphatase 1, catalytic subunit, beta isoform (Ppp1cb)        | 0.87 | $4.0 \times 10^{-3}$ | 0.94 | $1.4 \times 10^{-1}$ | 1.04 | $3.6 \times 10^{-1}$ |
| P26638 | Seryl-aminoacyl-tRNA synthetase (Sars)                                 | 0.88 | $5.0 \times 10^{-3}$ | 0.81 | $1.8 \times 10^{-1}$ | 1.01 | $8.6 \times 10^{-1}$ |
| Q61398 | Procollagen C-endopeptidase enhancer protein (Pcolce)                  | 0.24 | $6.1 \times 10^{-2}$ | 0.12 | $4.9 \times 10^{-3}$ | 0.95 | $7.4 \times 10^{-1}$ |
| P43025 | C-type lectin domain family 3, member b (Clec3b)                       | 0.04 | $4.0 \times 10^{-2}$ | 0.23 | $3.7 \times 10^{-3}$ | 0.40 | $9.7 \times 10^{-2}$ |
| P08030 | Adenine phosphoribosyl transferase (Aprt)                              | 0.51 | $3.2 \times 10^{-2}$ | 0.37 | $4.1 \times 10^{-3}$ | 1.22 | $3.0 \times 10^{-1}$ |
| P62270 | Ribosomal protein S18 (Rps18)                                          | 0.29 | $3.7 \times 10^{-2}$ | 0.40 | $5.6 \times 10^{-3}$ | 1.00 | $9.8 \times 10^{-1}$ |
| Q9EQK5 | Major vault protein (Mvp)                                              | 0.32 | $1.6 \times 10^{-2}$ | 0.40 | $6.6 \times 10^{-3}$ | 1.18 | $2.8 \times 10^{-1}$ |
| P27546 | Microtubule-associated protein 4 (Map4)                                | 0.53 | $3.5 \times 10^{-2}$ | 0.46 | $2.3 \times 10^{-3}$ | 1.12 | $3.6 \times 10^{-1}$ |
| O88587 | Catechol-O-methyltransferase (Comt)                                    | 0.63 | $1.7 \times 10^{-2}$ | 0.50 | $9.2 \times 10^{-3}$ | 1.31 | $1.0 \times 10^{-1}$ |
| Q9R0P9 | Ubiquitin carboxy-terminal hydrolase L1 (Uchl1)                        | 0.59 | $2.4 \times 10^{-2}$ | 0.52 | $6.0 \times 10^{-3}$ | 1.21 | $1.8 \times 10^{-1}$ |
| Q99L47 | Suppression of tumorigenicity 13 (St13)                                | 0.57 | $1.6 \times 10^{-2}$ | 0.53 | $5.0 \times 10^{-4}$ | 1.10 | $1.7 \times 10^{-1}$ |
| P97298 | Serine (or cysteine) peptidase inhibitor, clade F, member 1 (Serpinf1) | 0.51 | $4.3 \times 10^{-2}$ | 0.53 | $2.3 \times 10^{-3}$ | 0.86 | $4.6 \times 10^{-1}$ |
| Q9D5V6 | Synapse associated protein 1 (Syap1)                                   | 0.76 | $2.6 \times 10^{-2}$ | 0.62 | $1.9 \times 10^{-3}$ | 1.06 | $5.3 \times 10^{-2}$ |
| Q9CPV4 | Glyoxalase domain containing 4 (Glod4)                                 | 0.61 | $1.6 \times 10^{-2}$ | 0.65 | $2.9 \times 10^{-3}$ | 1.05 | $6.7 \times 10^{-1}$ |
| Q9WVA4 | Transgelin 2 (Tagln2)                                                  | 0.57 | $1.8 \times 10^{-2}$ | 0.73 | $4.1 \times 10^{-3}$ | 0.88 | $1.6 \times 10^{-1}$ |
| Q8C1B7 | Septin 11 (Sept11)                                                     | 0.75 | $1.3 \times 10^{-2}$ | 0.75 | $2.4 \times 10^{-4}$ | 1.00 | $9.8 \times 10^{-1}$ |
| Q922B2 | Aspartyl-tRNA synthetase (Dars)                                        | 0.92 | $4.3 \times 10^{-1}$ | 0.78 | $4.3 \times 10^{-3}$ | 0.95 | $5.0 \times 10^{-1}$ |

|        |                                                                         |      |                      |      |                      |      |                      |
|--------|-------------------------------------------------------------------------|------|----------------------|------|----------------------|------|----------------------|
| P97372 | Proteasome (prosome, macropain) activator subunit 2 (PA28 beta) (Psme2) | 0.91 | $2.0 \times 10^{-1}$ | 0.79 | $4.8 \times 10^{-3}$ | 1.12 | $2.9 \times 10^{-1}$ |
| Q9CVB6 | Actin related protein 2/3 complex, subunit 2 (Arpc2)                    | 0.70 | $1.3 \times 10^{-2}$ | 0.80 | $4.1 \times 10^{-3}$ | 0.96 | $6.7 \times 10^{-1}$ |
| O35593 | Proteasome (prosome, macropain) 26S subunit, non-ATPase, 14 (Psm14)     | 0.85 | $1.4 \times 10^{-1}$ | 0.81 | $5.9 \times 10^{-3}$ | 1.18 | $4.1 \times 10^{-2}$ |
| Q11011 | Aminopeptidase puromycin sensitive (Npepps)                             | 0.78 | $1.0 \times 10^{-2}$ | 0.83 | $7.8 \times 10^{-3}$ | 1.00 | $9.4 \times 10^{-1}$ |

104

105 **b: The proteins in EDL muscles**

| Accession | Gene name                                                                         | $\mu$ -g & FOS (-)<br>/A1-g & FOS (-) |                      | $\mu$ -g & FOS (+)<br>/A1-g & FOS (-) |                      | A1-g & FOS (+)<br>/A1-g & FOS (-) |                      |
|-----------|-----------------------------------------------------------------------------------|---------------------------------------|----------------------|---------------------------------------|----------------------|-----------------------------------|----------------------|
|           |                                                                                   | Fold change                           | <i>P</i> value       | Fold change                           | <i>P</i> value       | Fold change                       | <i>P</i> value       |
| P54071    | Isocitrate dehydrogenase 2 (NADP+), mitochondrial (Idh2)                          | 1.43                                  | $8.5 \times 10^{-4}$ | 1.45                                  | $3.2 \times 10^{-4}$ | 0.98                              | $6.3 \times 10^{-1}$ |
| P04247    | Myoglobin (Mb)                                                                    | 1.38                                  | $1.1 \times 10^{-3}$ | 1.57                                  | $2.2 \times 10^{-3}$ | 0.98                              | $7.6 \times 10^{-1}$ |
| P16125    | Lactate dehydrogenase B (Ldhd)                                                    | 1.35                                  | $2.1 \times 10^{-3}$ | 1.41                                  | $3.2 \times 10^{-3}$ | 0.95                              | $5.2 \times 10^{-1}$ |
| P01027    | Complement component 3 (C3)                                                       | 1.35                                  | $8.3 \times 10^{-3}$ | 1.48                                  | $4.5 \times 10^{-2}$ | 1.17                              | $1.1 \times 10^{-1}$ |
| P14094    | ATPase, Na <sup>+</sup> /K <sup>+</sup> transporting, beta 1 polypeptide (Atp1b1) | 1.32                                  | $2.5 \times 10^{-4}$ | 1.48                                  | $1.1 \times 10^{-3}$ | 1.10                              | $1.8 \times 10^{-1}$ |
| O09131    | Glutathione S-transferase omega 1 (Gsto1)                                         | 1.30                                  | $2.2 \times 10^{-3}$ | 1.41                                  | $1.6 \times 10^{-4}$ | 1.00                              | $9.8 \times 10^{-1}$ |
| P47791    | Glutathione reductase (Gsr)                                                       | 1.21                                  | $2.6 \times 10^{-3}$ | 1.30                                  | $1.1 \times 10^{-2}$ | 0.92                              | $2.0 \times 10^{-1}$ |
| P28271    | Aconitase 1 (Aco1)                                                                | 1.21                                  | $5.9 \times 10^{-3}$ | 1.21                                  | $8.0 \times 10^{-2}$ | 0.96                              | $3.7 \times 10^{-1}$ |
| Q8CDN6    | Thioredoxin-like 1 (Txnl1)                                                        | 1.19                                  | $9.8 \times 10^{-3}$ | 1.14                                  | $5.0 \times 10^{-2}$ | 1.07                              | $1.3 \times 10^{-1}$ |
| O88342    | WD repeat domain 1 (Wdr1)                                                         | 1.18                                  | $5.3 \times 10^{-3}$ | 1.23                                  | $9.4 \times 10^{-4}$ | 0.99                              | $8.3 \times 10^{-1}$ |
| P47199    | Crystallin, zeta (Cryz)                                                           | 1.12                                  | $7.1 \times 10^{-3}$ | 1.11                                  | $1.3 \times 10^{-2}$ | 1.06                              | $1.2 \times 10^{-1}$ |
| Q11011    | Aminopeptidase puromycin sensitive (Npepps)                                       | 1.08                                  | $5.9 \times 10^{-3}$ | 1.05                                  | $2.3 \times 10^{-1}$ | 0.98                              | $4.2 \times 10^{-1}$ |
| Q9DBB9    | Carboxypeptidase N, polypeptide 2 (Cpn2)                                          | 1.00                                  | 1.0                  | Infinity                              | $3.4 \times 10^{-5}$ | Infinity (High)                   | $3.7 \times 10^{-1}$ |
| P13634    | Carbonic anhydrase 1 (Car1)                                                       | 1.27                                  | $1.9 \times 10^{-1}$ | 1.86                                  | $4.4 \times 10^{-3}$ | 1.13                              | $7.0 \times 10^{-1}$ |



|        |                                                                                 |      |                      |      |                      |      |                      |
|--------|---------------------------------------------------------------------------------|------|----------------------|------|----------------------|------|----------------------|
| Q8VD04 | GRIP1 associated protein 1<br>(Gripap1)                                         | 1.38 | $3.3 \times 10^{-1}$ | 1.78 | $2.2 \times 10^{-3}$ | 1.15 | $2.1 \times 10^{-1}$ |
| Q5SUV5 | Myosin light chain kinase family,<br>member 4 (Mylk4)                           | 1.35 | $1.3 \times 10^{-2}$ | 1.65 | $1.3 \times 10^{-3}$ | 0.98 | $8.0 \times 10^{-1}$ |
| P07309 | Transthyretin (Ttr)                                                             | 1.15 | $3.0 \times 10^{-1}$ | 1.47 | $6.9 \times 10^{-3}$ | 0.95 | $5.6 \times 10^{-1}$ |
| P22599 | Serine (or cysteine) preptidase<br>inhibitor, clade A, member 1B<br>(Serpina1b) | 1.17 | $1.3 \times 10^{-1}$ | 1.43 | $5.6 \times 10^{-3}$ | 1.03 | $8.4 \times 10^{-1}$ |
| P07724 | Albumin (Alb)                                                                   | 1.13 | $2.5 \times 10^{-1}$ | 1.40 | $7.2 \times 10^{-3}$ | 1.03 | $7.7 \times 10^{-1}$ |
| P00920 | Carbonic anhydrase 2 (Car2)                                                     | 1.08 | $2.0 \times 10^{-1}$ | 1.37 | $7.1 \times 10^{-3}$ | 1.02 | $9.6 \times 10^{-1}$ |
| P07759 | Serine (or cysteine) peptidase<br>inhibitor, clade A, member 3K<br>(Serpina3k)  | 1.24 | $1.6 \times 10^{-1}$ | 1.36 | $5.3 \times 10^{-3}$ | 0.93 | $4.7 \times 10^{-1}$ |
| Q6P1B1 | X-prolyl aminopeptidase<br>(aminopeptidase P) 1, soluble<br>(Xpnpep1)           | 1.30 | $3.3 \times 10^{-2}$ | 1.32 | $4.8 \times 10^{-3}$ | 1.03 | $7.6 \times 10^{-1}$ |
| Q9D6Y9 | Glucan (1,4-alpha-), branching<br>enzyme 1 (Gbe1)                               | 1.22 | $1.6 \times 10^{-2}$ | 1.29 | $8.6 \times 10^{-4}$ | 0.96 | $5.3 \times 10^{-1}$ |
| Q921I1 | Transferrin (Trf)                                                               | 1.11 | $3.6 \times 10^{-1}$ | 1.29 | $4.0 \times 10^{-3}$ | 0.92 | $3.4 \times 10^{-1}$ |
| Q9JI91 | Actinin alpha 2 (Actn2)                                                         | 1.17 | $3.5 \times 10^{-2}$ | 1.28 | $6.2 \times 10^{-3}$ | 1.04 | $4.8 \times 10^{-1}$ |
| Q9D358 | Acid phosphatase 1, soluble<br>(Acp1)                                           | 1.12 | $2.3 \times 10^{-2}$ | 1.25 | $3.6 \times 10^{-3}$ | 1.01 | $9.4 \times 10^{-1}$ |
| Q91VF2 | Histamine N-methyltransferase<br>(Hnmt)                                         | 1.01 | $9.1 \times 10^{-1}$ | 1.25 | $5.7 \times 10^{-3}$ | 1.17 | $3.5 \times 10^{-1}$ |
| Q9DCW4 | Electron transferring flavoprotein,<br>beta polypeptide (Etfb)                  | 1.15 | $1.5 \times 10^{-2}$ | 1.19 | $3.5 \times 10^{-3}$ | 1.01 | $6.4 \times 10^{-1}$ |
| P20108 | Peroxiredoxin 3 (Prdx3)                                                         | 1.04 | $4.5 \times 10^{-1}$ | 1.18 | $7.7 \times 10^{-3}$ | 1.04 | $5.2 \times 10^{-1}$ |
| P31786 | Diazepam binding inhibitor (Dbi)                                                | 1.10 | $7.6 \times 10^{-2}$ | 1.18 | $8.6 \times 10^{-3}$ | 1.07 | $2.4 \times 10^{-1}$ |
| Q99LC5 | Electron transferring flavoprotein,<br>alpha polypeptide (Etfalpha)             | 1.13 | $1.1 \times 10^{-2}$ | 1.17 | $2.4 \times 10^{-3}$ | 1.00 | $9.6 \times 10^{-1}$ |
| P99029 | Peroxiredoxin 5 (Prdx5)                                                         | 1.06 | $1.2 \times 10^{-1}$ | 1.13 | $1.0 \times 10^{-4}$ | 0.95 | $1.6 \times 10^{-1}$ |
| Q9Z2Y8 | Proline synthetase co-transcribed<br>(Prosc)                                    | 1.10 | $1.3 \times 10^{-2}$ | 1.10 | $9.8 \times 10^{-3}$ | 1.04 | $4.8 \times 10^{-1}$ |
| P14152 | Malate dehydrogenase 1, NAD<br>(soluble) (Mdh1)                                 | 1.05 | $1.4 \times 10^{-1}$ | 1.09 | $6.2 \times 10^{-3}$ | 0.99 | $8.0 \times 10^{-1}$ |

|        |                                                                                           |          |                      |      |                      |      |                      |
|--------|-------------------------------------------------------------------------------------------|----------|----------------------|------|----------------------|------|----------------------|
| Q8BTM8 | Filamin, alpha (Flna)                                                                     | Infinity | $4.8 \times 10^{-5}$ | 0.71 | $4.1 \times 10^{-1}$ | 1.04 | $4.9 \times 10^{-1}$ |
| P14148 | Ribosomal protein L7 (Rpl7)                                                               | 0.57     | $2.1 \times 10^{-3}$ | 0.61 | $8.1 \times 10^{-3}$ | 0.76 | $8.1 \times 10^{-2}$ |
| P62082 | Ribosomal protein S7 (Rps7)                                                               | 0.59     | $6.4 \times 10^{-3}$ | 0.55 | $4.0 \times 10^{-3}$ | 0.68 | $1.6 \times 10^{-1}$ |
| Q9CXW4 | Ribosomal protein L11 (Rpl11)                                                             | 0.68     | $3.5 \times 10^{-3}$ | 0.74 | $1.7 \times 10^{-2}$ | 0.87 | $3.2 \times 10^{-1}$ |
| P14602 | Heat shock protein 1 (Hspb1)                                                              | 0.70     | $4.9 \times 10^{-3}$ | 0.76 | $1.3 \times 10^{-2}$ | 1.17 | $3.7 \times 10^{-1}$ |
| Q922B2 | Aspartyl-tRNA synthetase (Dars)                                                           | 0.71     | $7.9 \times 10^{-3}$ | 0.59 | $3.7 \times 10^{-3}$ | 0.85 | $1.0 \times 10^{-1}$ |
| P70670 | Nascent polypeptide-associated complex alpha polypeptide (Naca)                           | 0.72     | $4.5 \times 10^{-4}$ | 0.66 | $3.7 \times 10^{-4}$ | 0.88 | $4.1 \times 10^{-2}$ |
| P08113 | Heat shock protein 90, beta (Grp94), member 1 (Hsp90b1)                                   | 0.73     | $2.5 \times 10^{-3}$ | 0.60 | $5.2 \times 10^{-4}$ | 0.82 | $7.4 \times 10^{-2}$ |
| P60710 | Actin, beta (Actb)                                                                        | 0.76     | $2.7 \times 10^{-3}$ | 0.72 | $2.0 \times 10^{-2}$ | 0.90 | $4.7 \times 10^{-1}$ |
| P99027 | Ribosomal protein, large P2 (Rplp2)                                                       | 0.76     | $4.6 \times 10^{-3}$ | 0.76 | $1.0 \times 10^{-2}$ | 0.95 | $5.1 \times 10^{-1}$ |
| Q9CQ65 | Methylthioadenosine phosphorylase (Mtap)                                                  | 0.79     | $4.2 \times 10^{-3}$ | 0.78 | $2.1 \times 10^{-2}$ | 1.19 | $1.5 \times 10^{-2}$ |
| P11499 | Heat shock protein 90 alpha (cytosolic), class B member 1 (Hsp90ab1)                      | 0.80     | $6.5 \times 10^{-3}$ | 0.72 | $2.7 \times 10^{-3}$ | 0.93 | $2.2 \times 10^{-1}$ |
| P68040 | Receptor for activated C kinase 1 (Rack1)                                                 | 0.81     | $8.6 \times 10^{-3}$ | 0.76 | $4.3 \times 10^{-3}$ | 0.90 | $1.2 \times 10^{-1}$ |
| Q01853 | valosin containing protein (Vcp)                                                          | 0.81     | $6.8 \times 10^{-3}$ | 0.82 | $7.0 \times 10^{-3}$ | 1.00 | $9.7 \times 10^{-1}$ |
| P14211 | Calreticulin (Calr)                                                                       | 0.81     | $5.8 \times 10^{-3}$ | 0.79 | $4.1 \times 10^{-3}$ | 0.91 | $1.4 \times 10^{-1}$ |
| P14206 | Ribosomal protein SA (Rpsa)                                                               | 0.81     | $6.5 \times 10^{-3}$ | 0.78 | $4.4 \times 10^{-3}$ | 0.90 | $1.2 \times 10^{-1}$ |
| Q64105 | Sepiapterin reductase (Spr)                                                               | 0.82     | $2.3 \times 10^{-3}$ | 0.80 | $1.5 \times 10^{-2}$ | 1.00 | $9.5 \times 10^{-1}$ |
| P34914 | Epoxide hydrolase 2, cytoplasmic (Ephx2)                                                  | 0.83     | $8.8 \times 10^{-3}$ | 0.85 | $8.7 \times 10^{-2}$ | 0.99 | $8.4 \times 10^{-1}$ |
| P62141 | Protein phosphatase 1, catalytic subunit, beta isoform (Ppp1cb)                           | 0.85     | $3.9 \times 10^{-3}$ | 0.85 | $9.6 \times 10^{-3}$ | 0.95 | $2.8 \times 10^{-1}$ |
| P14824 | Annexin A6 (Anxa6)                                                                        | 0.86     | $2.9 \times 10^{-3}$ | 0.84 | $1.4 \times 10^{-3}$ | 0.98 | $5.1 \times 10^{-1}$ |
| Q9CWI9 | 5-aminoimidazole-4-carboxamide ribonucleotide formyltransferase/IMP cyclohydrolase (Atic) | 0.90     | $5.6 \times 10^{-3}$ | 0.88 | $1.5 \times 10^{-1}$ | 1.01 | 1.0                  |
| Q8VED5 | Keratin 79 (Krt79)                                                                        | 1.04     | $5.5 \times 10^{-1}$ | 0.06 | $2.5 \times 10^{-3}$ | 0.37 | $3.0 \times 10^{-2}$ |

|        |                                                                           |      |                      |      |                      |      |                      |
|--------|---------------------------------------------------------------------------|------|----------------------|------|----------------------|------|----------------------|
| P80318 | Chaperonin containing Tcp1, subunit 3 (gamma) (Cct3)                      | 0.61 | $1.3 \times 10^{-2}$ | 0.45 | $2.8 \times 10^{-3}$ | 0.84 | $2.4 \times 10^{-1}$ |
| P47857 | Phosphofructokinase, muscle (Pfkf)                                        | 0.78 | $2.4 \times 10^{-2}$ | 0.55 | $3.0 \times 10^{-3}$ | 0.92 | $4.1 \times 10^{-1}$ |
| P80314 | Chaperonin containing Tcp1, subunit 2 (beta) (Cct2)                       | 0.69 | $3.2 \times 10^{-2}$ | 0.60 | $1.6 \times 10^{-3}$ | 0.85 | $6.0 \times 10^{-2}$ |
| Q9D0I9 | Arginyl-tRNA synthetase (Rars)                                            | 0.74 | $2.7 \times 10^{-2}$ | 0.61 | $3.1 \times 10^{-3}$ | 0.89 | $3.3 \times 10^{-1}$ |
| Q8VCT3 | Arginyl aminopeptidase (aminopeptidase B) (Rnpep)                         | 0.88 | $2.1 \times 10^{-2}$ | 0.66 | $1.5 \times 10^{-4}$ | 1.01 | $9.7 \times 10^{-1}$ |
| Q9D8N0 | Eukaryotic translation elongation factor 1 gamma (Eef1g)                  | 0.84 | $3.3 \times 10^{-2}$ | 0.69 | $1.7 \times 10^{-3}$ | 0.92 | $2.3 \times 10^{-1}$ |
| P62274 | Ribosomal protein S29 (Rps29)                                             | 0.79 | $3.4 \times 10^{-2}$ | 0.70 | $5.8 \times 10^{-3}$ | 0.98 | $8.0 \times 10^{-1}$ |
| Q8K183 | Pyridoxal (pyridoxine, vitamin B6) kinase (Pdxk)                          | 0.88 | $1.3 \times 10^{-1}$ | 0.77 | $6.8 \times 10^{-3}$ | 0.95 | $4.8 \times 10^{-1}$ |
| P68033 | Actin, alpha, cardiac muscle 1 (Actc1)                                    | 0.99 | $9.0 \times 10^{-1}$ | 0.77 | $1.9 \times 10^{-3}$ | 0.95 | $6.1 \times 10^{-1}$ |
| P58252 | Eukaryotic translation elongation factor 2 (Eef2)                         | 0.87 | $1.5 \times 10^{-2}$ | 0.80 | $7.2 \times 10^{-4}$ | 0.95 | $4.9 \times 10^{-1}$ |
| P15327 | 2,3-bisphosphoglycerate mutase (Bpgm)                                     | 0.84 | $6.6 \times 10^{-2}$ | 0.84 | $6.9 \times 10^{-4}$ | 1.02 | $4.4 \times 10^{-1}$ |
| Q93092 | Transaldolase 1 (Taldo1)                                                  | 0.90 | $1.8 \times 10^{-2}$ | 0.84 | $2.4 \times 10^{-3}$ | 0.96 | $3.9 \times 10^{-1}$ |
| Q8BHG2 | RIKEN cDNA 0610037L13 gene (0610037L13Rik)                                | 0.96 | $4.4 \times 10^{-1}$ | 0.86 | $7.9 \times 10^{-3}$ | 0.93 | $1.6 \times 10^{-1}$ |
| P06151 | Lactate dehydrogenase A (Ldha)                                            | 0.93 | $2.1 \times 10^{-2}$ | 0.87 | $2.8 \times 10^{-3}$ | 0.98 | $6.1 \times 10^{-1}$ |
| P05064 | Aldolase A, fructose-bisphosphate (Aldoa)                                 | 0.92 | $6.1 \times 10^{-2}$ | 0.88 | $7.7 \times 10^{-3}$ | 1.02 | $1.0 \times 10^{-1}$ |
| Q9JKB1 | Ubiquitin carboxyl-terminal esterase L3 (ubiquitin thiolesterase) (Uchl3) | 0.96 | $1.1 \times 10^{-1}$ | 0.89 | $8.6 \times 10^{-3}$ | 0.97 | $6.9 \times 10^{-1}$ |

106

107

108 **Supplementary Table 8: Results of gene ontology analysis for the soleus (Sol)**  
109 **muscle proteins, which were significantly affected by fructo-oligosaccharide (FOS)**  
110 **ingestion.** Gene ontology analysis was performed using DAVID Bioinformatics  
111 Resources 6.8. The results for the significant higher-abundance of proteins ( $p < 0.01$ ) in  
112 Sol muscles of mice exposed to artificial 1-g (A1-g) with FOS ingestion than those of  
113 mice exposed to A1-g without FOS ingestion are depicted. The indices in biological  
114 process and cellular component with Benjamini values less than 0.05 are shown. The  
115 results for the low-abundance proteins ( $p < 0.01$ ) in mice exposed to A1-g with FOS  
116 ingestion than those in mice exposed to A1-g without FOS ingestion did not meet the  
117 criterion.

118

119 For the high-abundance of proteins in A1-g & FOS (+) vs. A1-g & FOS (-) groups

| <b>Term</b>               | <b>No. of proteins</b> | <b>Benjamini value</b> |
|---------------------------|------------------------|------------------------|
| <b>Biological process</b> |                        |                        |
| None                      | None                   | None                   |
| <b>Cellular component</b> |                        |                        |
| Cytoplasm                 | 17                     | $2.30 \times 10^{-3}$  |
| Extracellular exosome     | 11                     | $2.70 \times 10^{-3}$  |
| Myosin filament           | 3                      | $2.90 \times 10^{-3}$  |
| Myelin sheath             | 4                      | $1.80 \times 10^{-2}$  |

120

121

122 **Supplementary Table 9: Responses of soleus (Sol) muscle proteins composing Z-**  
123 **disc to microgravity ( $\mu$ -g) or artificial 1-g (A1-g) exposure and/or fructo-**  
124 **oligosaccharide (FOS) ingestion.** The protein abundance profiles in Sol muscles of the  
125 groups exposed to  $\mu$ -g with and without FOS ingestion and the group exposed to A1-g  
126 with FOS ingestion were individually compared with that of the group exposed to A1-g  
127 without FOS ingestion. The results for the proteins, which were categorized as the  
128 components of Z-disk by DAVID Bioinformatics Resources 6.8 and significantly ( $p <$   
129 0.01) affected by  $\mu$ -g exposure and/or FOS ingestion, are indicated. The significant  
130 high- and low-abundance of proteins are indicated in orange and blue, respectively.  
131

| Accession | Gene name                                 | $\mu$ -g & FOS (-)<br>/A1-g & FOS (-) |                      | $\mu$ -g & FOS (+)<br>/A1-g & FOS (-) |                      | A1-g & FOS (+)<br>/A1-g & FOS (-) |                      |
|-----------|-------------------------------------------|---------------------------------------|----------------------|---------------------------------------|----------------------|-----------------------------------|----------------------|
|           |                                           | Fold change                           | <i>P</i> value       | Fold change                           | <i>P</i> value       | Fold change                       | <i>P</i> value       |
| O88990    | Actinin alpha 3 (Actn3)                   | 2.66                                  | $3.7 \times 10^{-5}$ | 1.82                                  | $1.4 \times 10^{-3}$ | 1.08                              | $5.2 \times 10^{-1}$ |
| P05064    | Aldolase A, fructose-bisphosphate (Aldoa) | 1.78                                  | $1.5 \times 10^{-4}$ | 1.53                                  | $4.8 \times 10^{-3}$ | 0.96                              | $5.1 \times 10^{-1}$ |
| Q02357    | Ankyrin 1, erythroid (Ank1)               | 1.10                                  | $3.1 \times 10^{-1}$ | 1.37                                  | $8.8 \times 10^{-3}$ | 0.92                              | $3.4 \times 10^{-1}$ |
| Q9JLV1    | BCL2-associated athanogene 3 (Bag3)       | 1.09                                  | $3.1 \times 10^{-1}$ | 1.39                                  | $5.8 \times 10^{-4}$ | 1.06                              | $1.6 \times 10^{-1}$ |
| Q9R059    | Four and a half LIM domains 3 (Fhl3)      | 1.40                                  | $1.1 \times 10^{-2}$ | 1.38                                  | $2.3 \times 10^{-3}$ | 1.13                              | $3.7 \times 10^{-1}$ |
| P70695    | Fructose bisphosphatase 2 (Fbp2)          | 2.46                                  | $1.5 \times 10^{-2}$ | 2.71                                  | $2.4 \times 10^{-3}$ | 1.16                              | $3.4 \times 10^{-1}$ |
| P14602    | Heat shock protein 1 (Hspb1)              | 1.59                                  | $1.3 \times 10^{-3}$ | 1.80                                  | $2.7 \times 10^{-3}$ | 1.13                              | $1.1 \times 10^{-1}$ |
| Q9ET80    | Junctophilin 1 (Jph1)                     | 1.31                                  | $1.9 \times 10^{-2}$ | 1.46                                  | $2.7 \times 10^{-3}$ | 0.96                              | $6.4 \times 10^{-1}$ |
| Q9WUB3    | Muscle glycogen phosphorylase (Pygm)      | 1.64                                  | $2.9 \times 10^{-3}$ | 1.39                                  | $2.2 \times 10^{-2}$ | 0.89                              | $1.3 \times 10^{-1}$ |
| A2AMM0    | Muscle-related coiled-coil protein (Murc) | 1.37                                  | $1.4 \times 10^{-2}$ | 1.44                                  | $6.2 \times 10^{-4}$ | 1.02                              | $7.3 \times 10^{-1}$ |

|        |                                                                      |      |                      |      |                      |      |                      |
|--------|----------------------------------------------------------------------|------|----------------------|------|----------------------|------|----------------------|
| O70209 | PDZ and LIM domain 3 (Pdlim3)                                        | 1.29 | $1.8 \times 10^{-3}$ | 1.29 | $1.4 \times 10^{-2}$ | 1.10 | $1.6 \times 10^{-1}$ |
| P63328 | Protein phosphatase 3, catalytic subunit, alpha isoform (Ppp3ca)     | 2.16 | $4.7 \times 10^{-4}$ | 2.28 | $3.6 \times 10^{-3}$ | 0.93 | $6.3 \times 10^{-1}$ |
| Q9JI91 | Actinin alpha 2 (Actn2)                                              | 0.82 | $1.1 \times 10^{-3}$ | 0.88 | $9.6 \times 10^{-4}$ | 1.09 | $7.5 \times 10^{-2}$ |
| P23927 | Crystallin, alpha B (Cryab)                                          | 0.48 | $1.1 \times 10^{-3}$ | 0.54 | $1.7 \times 10^{-5}$ | 1.10 | $8.7 \times 10^{-2}$ |
| P31001 | Desmin (Des)                                                         | 0.52 | $2.6 \times 10^{-4}$ | 0.51 | $2.6 \times 10^{-4}$ | 1.07 | $2.9 \times 10^{-1}$ |
| Q9CQM9 | Glutaredoxin 3 (Glr3)                                                | 0.82 | $2.6 \times 10^{-3}$ | 0.94 | $2.5 \times 10^{-1}$ | 0.91 | $2.1 \times 10^{-1}$ |
| Q9JKS4 | LIM domain binding 3 (Ldb3)                                          | 0.76 | $4.5 \times 10^{-3}$ | 0.81 | $2.0 \times 10^{-2}$ | 1.05 | $2.5 \times 10^{-1}$ |
| Q91Z83 | Myosin, heavy polypeptide 7, cardiac muscle, beta (Myh7)             | 0.77 | $3.5 \times 10^{-2}$ | 0.83 | $4.4 \times 10^{-3}$ | 1.38 | $3.7 \times 10^{-4}$ |
| Q9JIF9 | Myotilin (Myot)                                                      | 0.65 | $8.3 \times 10^{-5}$ | 0.67 | $6.4 \times 10^{-4}$ | 1.10 | $1.4 \times 10^{-2}$ |
| Q9JJW5 | Myozenin 2 (Myoz2)                                                   | 0.53 | $7.5 \times 10^{-5}$ | 0.64 | $1.9 \times 10^{-3}$ | 1.09 | $1.0 \times 10^{-1}$ |
| Q8CI51 | PDZ and LIM domain 5 (Pdlim5)                                        | 0.78 | $8.9 \times 10^{-3}$ | 0.84 | $6.2 \times 10^{-2}$ | 0.98 | $7.3 \times 10^{-1}$ |
| Q8BG95 | Protein phosphatase 1, regulatory (inhibitor) subunit 12B (Ppp1r12b) | 0.64 | $7.2 \times 10^{-3}$ | 0.62 | $3.7 \times 10^{-2}$ | 1.12 | $6.2 \times 10^{-2}$ |
| Q8CC35 | Synaptopodin (Synpo)                                                 | 0.37 | $1.6 \times 10^{-4}$ | 0.40 | $5.8 \times 10^{-4}$ | 1.03 | $6.3 \times 10^{-1}$ |
| Q91YE8 | Synaptopodin 2 (Synpo2)                                              | 0.60 | $5.7 \times 10^{-4}$ | 0.53 | $1.5 \times 10^{-3}$ | 1.04 | $4.0 \times 10^{-1}$ |
| Q8BWB1 | Synaptopodin 2-like (Synpo2l)                                        | 0.61 | $9.2 \times 10^{-5}$ | 0.56 | $1.3 \times 10^{-4}$ | 1.14 | $2.1 \times 10^{-2}$ |

132

133

134 **Supplementary Figure Legends**

135 **Supplementary Figure 1: Effects of spaceflight on body weight and wet weight of**  
136 **skeletal muscles in mice.** The data of mice fed a diet with (n = 3) or without (n = 3)  
137 fructo-oligosaccharide (FOS) are integrated in each group and presented as the mean ±  
138 standard deviation (SD) (n = 6). Body weight, absolute wet weight of soleus (Sol) and  
139 extensor digitorum longus (EDL) muscles, and the wet weight of Sol and EDL muscles  
140 relative to body weight are depicted in panels **a**, **b**, and **c**, respectively. Ground control  
141 (GC): group of mice raised in the ground model of the Multiple Artificial-gravity  
142 Research System (MARS) habitat and transportation cage units; artificial 1-g (A1-g):  
143 group of mice raised under A1-g in the International Space Station (ISS); microgravity  
144 ( $\mu$ -g): group of mice raised under  $\mu$ -g in the ISS.

145

146 **Supplementary Figure 2: The effects of microgravity ( $\mu$ -g) or artificial 1-g (A1-g)**  
147 **exposure on the abundance profiles of proteins in soleus (Sol) and extensor**  
148 **digitorum longus (EDL) muscles of mice, fed a diet with or without fructo-**  
149 **oligosaccharide (FOS).** Volcano plots of the proteins identified in Sol and EDL muscles,  
150 with the exception of the proteins for which fold changes were “Infinite”, are depicted.

151 The plots aid visualization of the effects of exposure to  $\mu$ -g or A1-g with or without FOS  
152 on the abundance profile of muscle proteins in mice.  
153



154

### Supplementary Figure 1

155

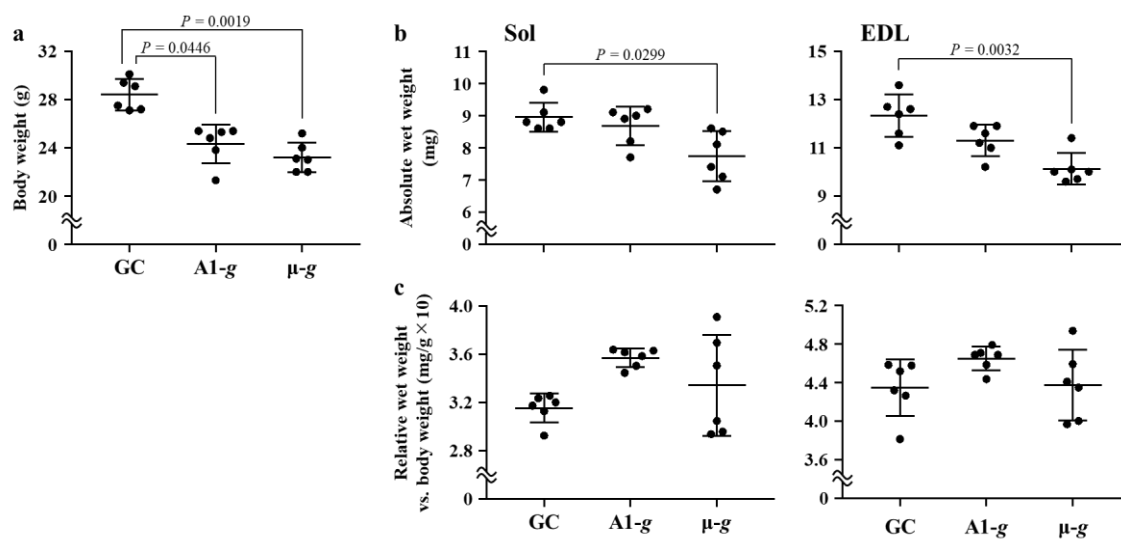

156

157

158

### Supplementary Figure 2

159

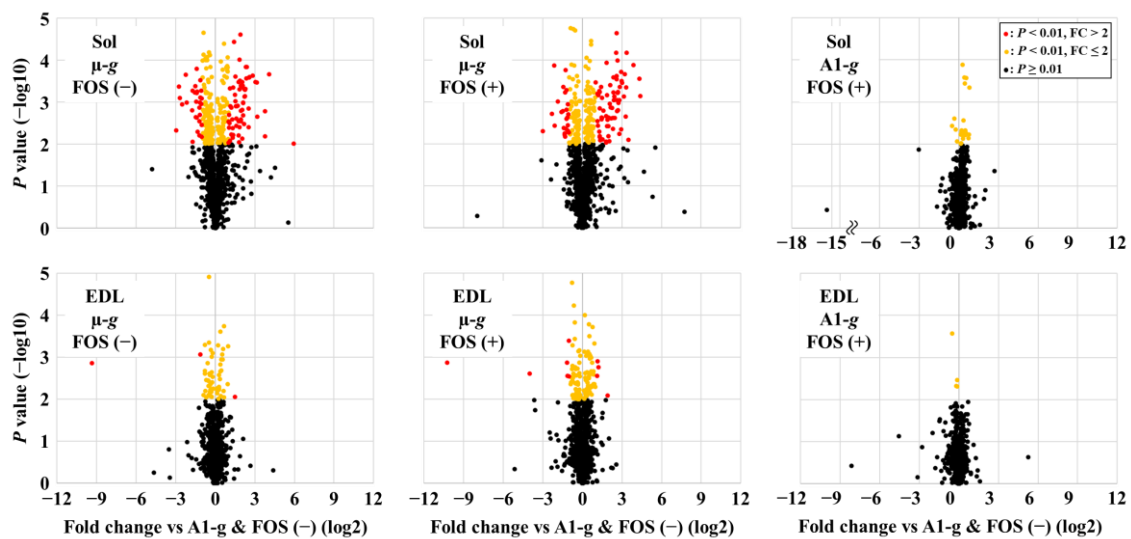

160

161
